# Supplementary material for: Cardiomyocyte S1PR1 promotes cardiac regeneration via AKT/mTORC1 signaling pathway
Source: PubMed Central journal article supplement (PMC11729560; doi:10.7150/thno.103797), 2025-01-02
Supplement: thnov15p1524s1.pdf [file thnov15p1524s1.pdf]

# Supplementary Figure 1

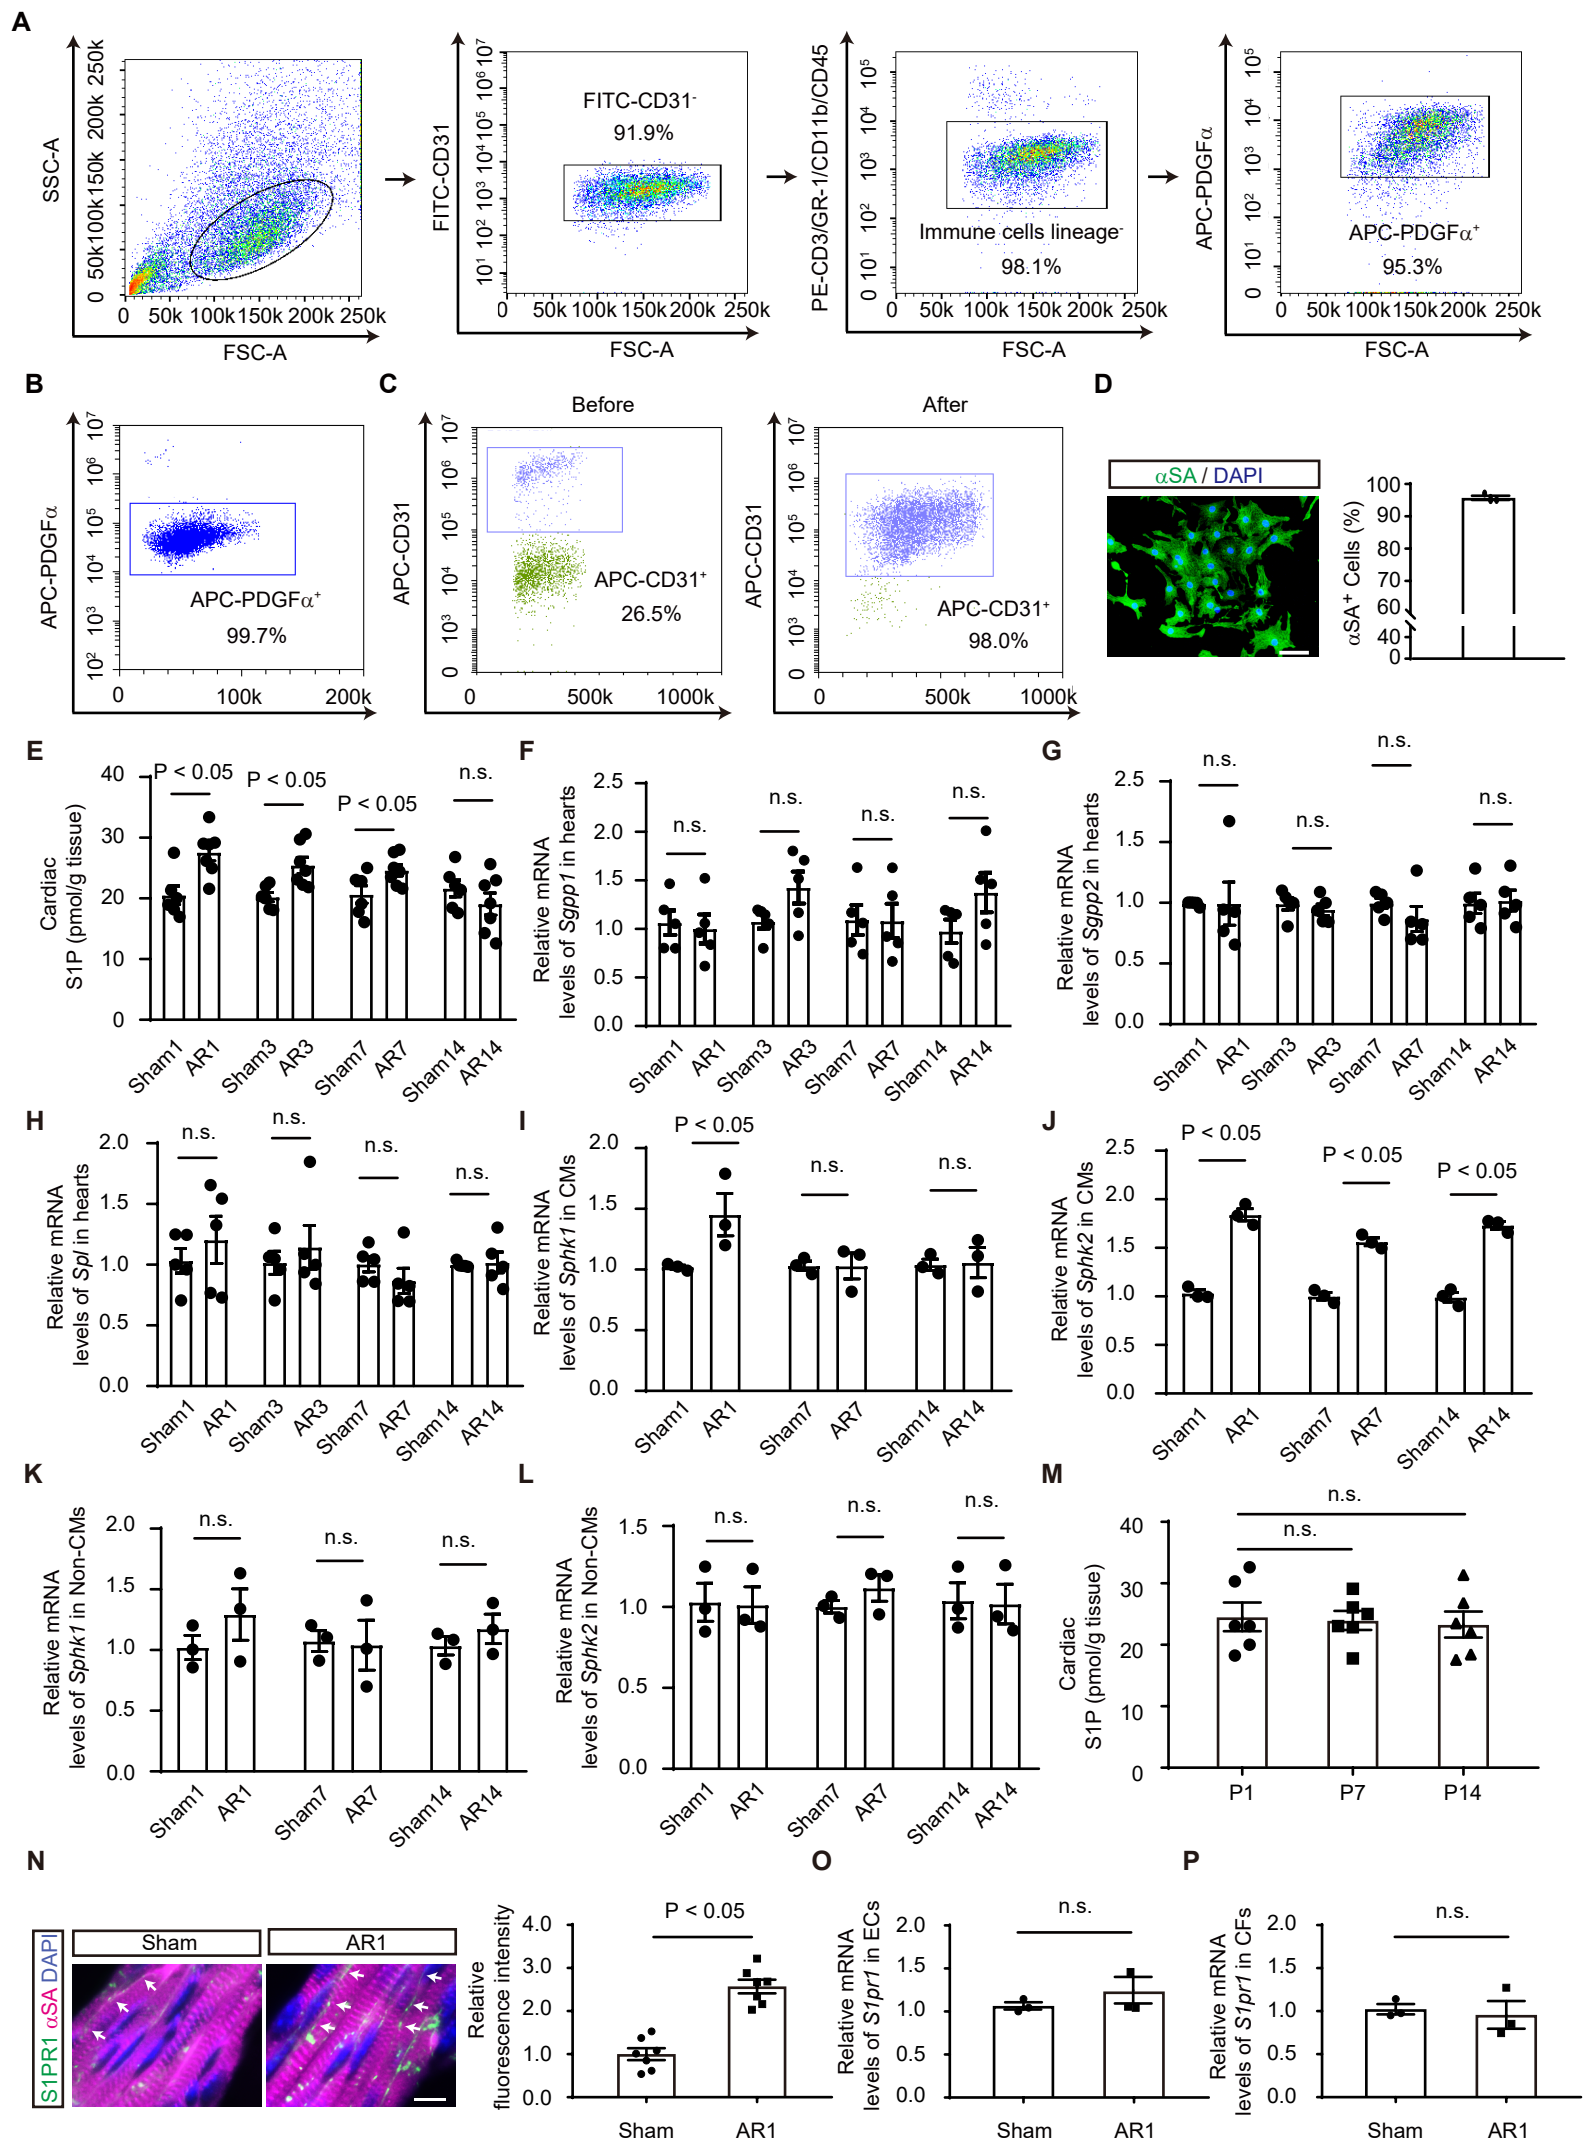

## Supplementary Figure 1 (Continued)

**Supplementary Figure 1. S1P receptor expression profile in cardiac tissues change after AR injury.** **A.** The representative flow cytometric plots for a typical CD31-lineage- $\text{PDGF}\alpha^+$  cell sorting procedure for isolation of cardiac fibroblasts from neonatal hearts. **B.** Cytometric analysis of the purity of cardiac fibroblasts after cell sorting, as shown in **(A)**. **C.** Cytometric analysis of the purity of cardiac ECs before and after cell purification by CD31-conjugated magnetic beads. **D.** Representative immunostaining images of  $\alpha$ -SA with quantification of the purity of cardiomyocytes ( $n = 3$ ). **E.** Cardiac sphingosine-1-phosphate (S1P) levels in heart tissues collected from mice which underwent the sham operation or the AR operation at postnatal day 3 (P3). Samples were collected at various post-operation time points (1-day, 3-day, 7-day and 14-day) and determined by ELISA ( $n = 7-8$ ). **F-H.** Relative mRNA expression levels were determined by quantitative RT-qPCR in heart tissues of mice which underwent sham operation at postnatal day 3 (P3). Samples were collected at various post-operation time points (1-day, 3-day, 7-day and 14-day), including *Sgpp1* (**F**), *Sgpp2* (**G**), *Spl* (**H**) ( $n = 5$ ). **I-J.** Relative mRNA expression levels were determined by quantitative RT-qPCR in cardiomyocytes (CMs) isolated from mice which underwent the sham operations or the AR operation at postnatal day 3 (P3). Samples were collected at various post-operation time points (1-day, 7-day and 14-day) including *Sphk1* (**I**), *Sphk2* (**J**) ( $n = 3$ ). **K-L.** Relative mRNA expression levels, including *Sphk1* (**K**) and *Sphk2* (**L**), were determined by quantitative RT-qPCR in non-cardiomyocytes of hearts collected from mice which underwent the sham operation or the AR operation at postnatal day 3 (P3). Samples were collected at various post-operation time points (1-day, 7-day and 14-day) ( $n = 3$ ). **M.** Cardiac sphingosine-1-phosphate (S1P) levels in heart tissues collected from postnatal day 1 (P1), postnatal day 7 (P7) and postnatal day 14 (P14) mice were determined by ELISA ( $n = 6$ ). **N.** Representative immunostaining images and quantification of percentage of S1PR1 fluorescence intensity in heart tissues from mice which underwent the sham operation or the AR operation at postnatal day 3 (P3). Hearts sections were collected from these mice at 1-day post AR. The arrows indicate that  $\alpha$ -SA (magenta) positive cardiomyocytes express S1PR1 (green). DAPI, nuclear staining (blue). Quantification of percentage of S1PR1 fluorescence intensity in immunostaining images of the sham hearts and the AR hearts at 1 day after operation ( $n = 7$ ). **O-P.** Relative mRNA expression levels of S1PR1 in endothelial cells (ECs) (**O**) and cardiac fibroblasts (CFs) (**P**) from the sham hearts or the AR hearts at 1 day after operation in neonatal mice which underwent sham or AR operation at postnatal day 3 (P3) were determined by quantitative RT-qPCR ( $n = 3$ ). Sham1, 1-day post sham operation; Sham3, 3-day post sham operation; Sham7, 7-day post sham operation; Sham14, 14-day post sham operation; AR1, 1-day post AR; AR3, 3-day post AR; AR7, 7-day post AR; AR14, 14-day post AR; P1, postnatal day 1 (P1); P7, postnatal day 7 (P7); P14, postnatal day 14 (P14).  $\alpha$ -SA,  $\alpha$ -sacromeric actinin. Data are represented as means  $\pm$  S.E.M.  $P < 0.05$  indicates significant statistical differences. n.s., no statistical significance. Unpaired Student's t-test (E-N). Scale bars: D, 50  $\mu\text{m}$ . N, 15  $\mu\text{m}$ .

## Supplementary Figure 2

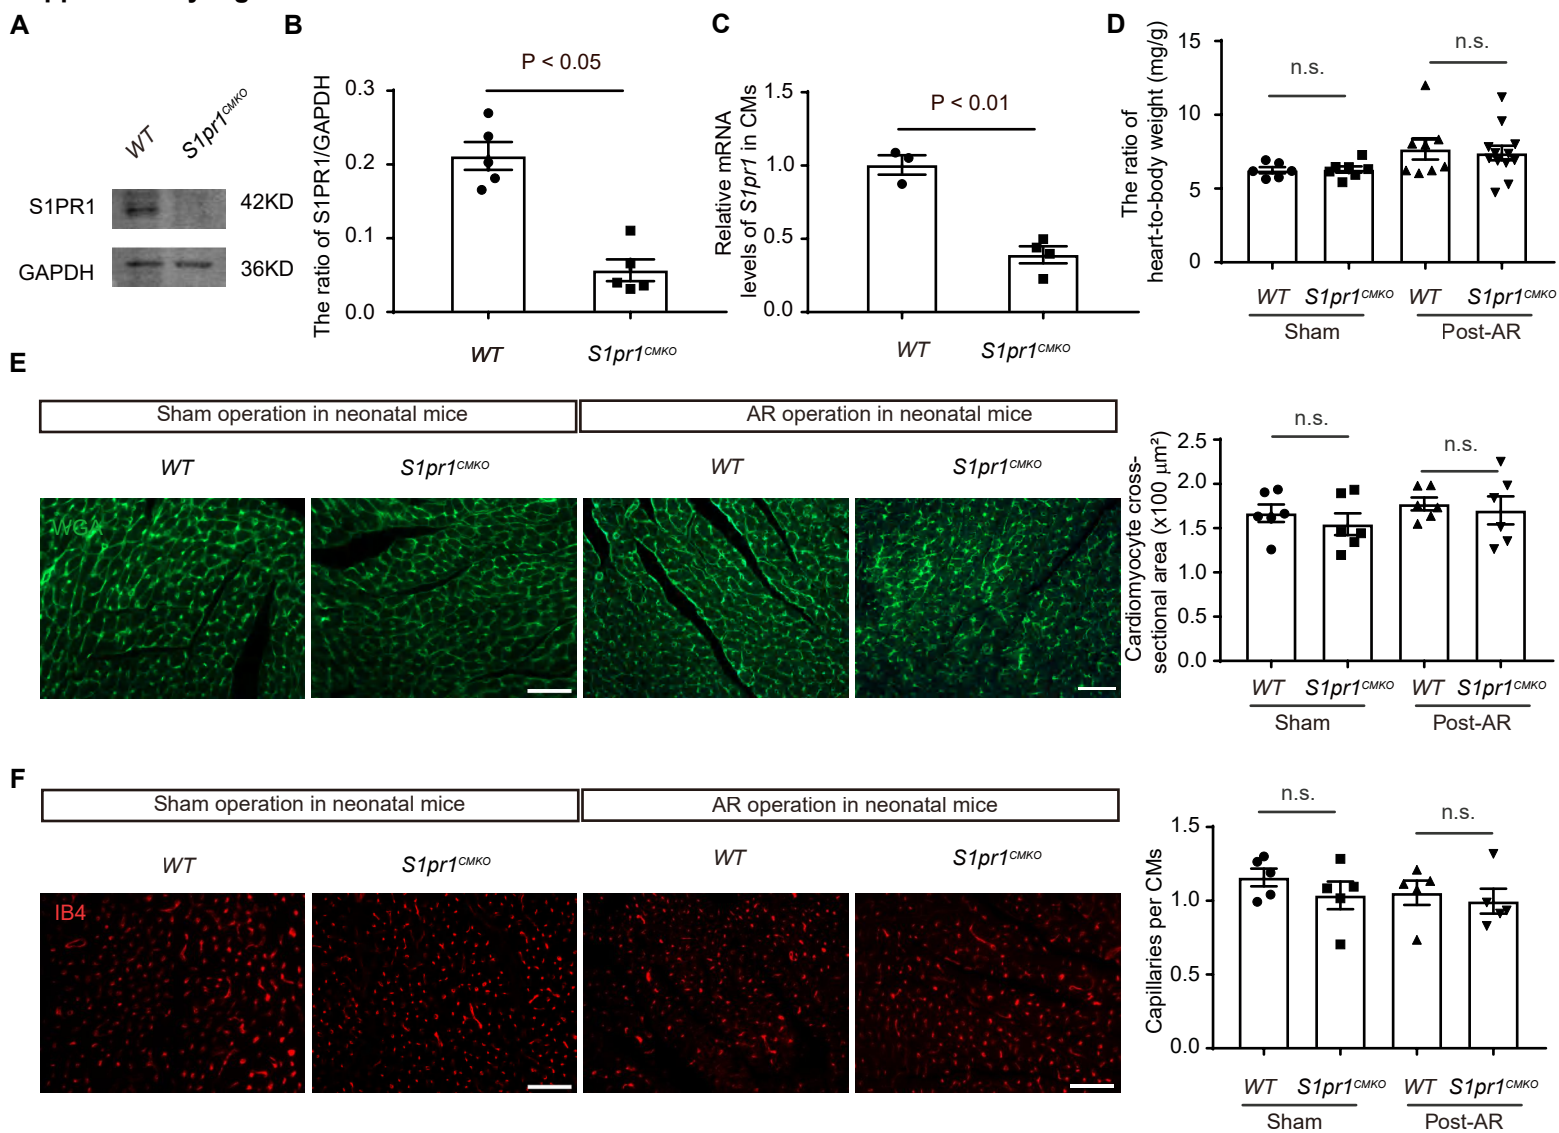

**Supplementary Figure 2. The loss of cardiomyocyte-expressing S1PR1 didn't influence cardiac hypertrophy and vascular density after AR in neonatal mice.** **A-B.** Western blot analysis of S1PR1 protein levels in cardiomyocytes from *WT* and *S1pr1<sup>CMKO</sup>* neonatal mice after tamoxifen were administered at postnatal day 0 to 1 to induce specific deletion of *S1pr1* in CMs (**A**). Cardiomyocytes (CMs) were collected from these mice at 7-day post tamoxifen injection. The quantification of the ratio of S1PR1/GAPDH was shown in **B** ( $n = 5$ ). **C.** The relative mRNA expression levels of *S1pr1* in cardiomyocytes was determined by RT-qPCR in the indicated mice after tamoxifen were administered at postnatal day 0 to 1 to induce specific deletion of *S1pr1* in CMs ( $n = 3-4$ ). Cardiomyocytes (CMs) were collected from these mice at 7-day post tamoxifen injection. **D.** The ratio of heart weight to body weight of *WT* and *S1pr1<sup>CMKO</sup>* mice which underwent the AR operation or sham operation at postnatal day 3 (P3), and hearts were collected from these mice at 21-day post AR ( $n = 6-12$ ). **E.** Representative images of WGA (green) staining of hearts from *WT* and *S1pr1<sup>CMKO</sup>* mice which underwent the AR operation or sham operation at postnatal day 3 (P3). Hearts sections were collected from these mice at 21-day post AR and quantification of cross-sectional size of CMs on the right ( $n = 6$ ). **F.** Representative images of IB4 (red) staining of hearts from *WT* and *S1pr1<sup>CMKO</sup>* mice which underwent the AR operation or sham operation at postnatal day 3 (P3). Hearts sections were collected from these mice at 21-day post AR and quantification of capillary density on the right ( $n = 5$ ). WGA, wheat germ agglutinin. IB4, biotinylated-isolectin B4. Data are represented as means  $\pm$  S.E.M.  $P < 0.05$  indicates significant statistical differences. n.s., no statistical significance. Unpaired Student's *t*-test (**B-F**). Scale bars: **E-F**, 50  $\mu\text{m}$ .

### Supplementary Figure 3

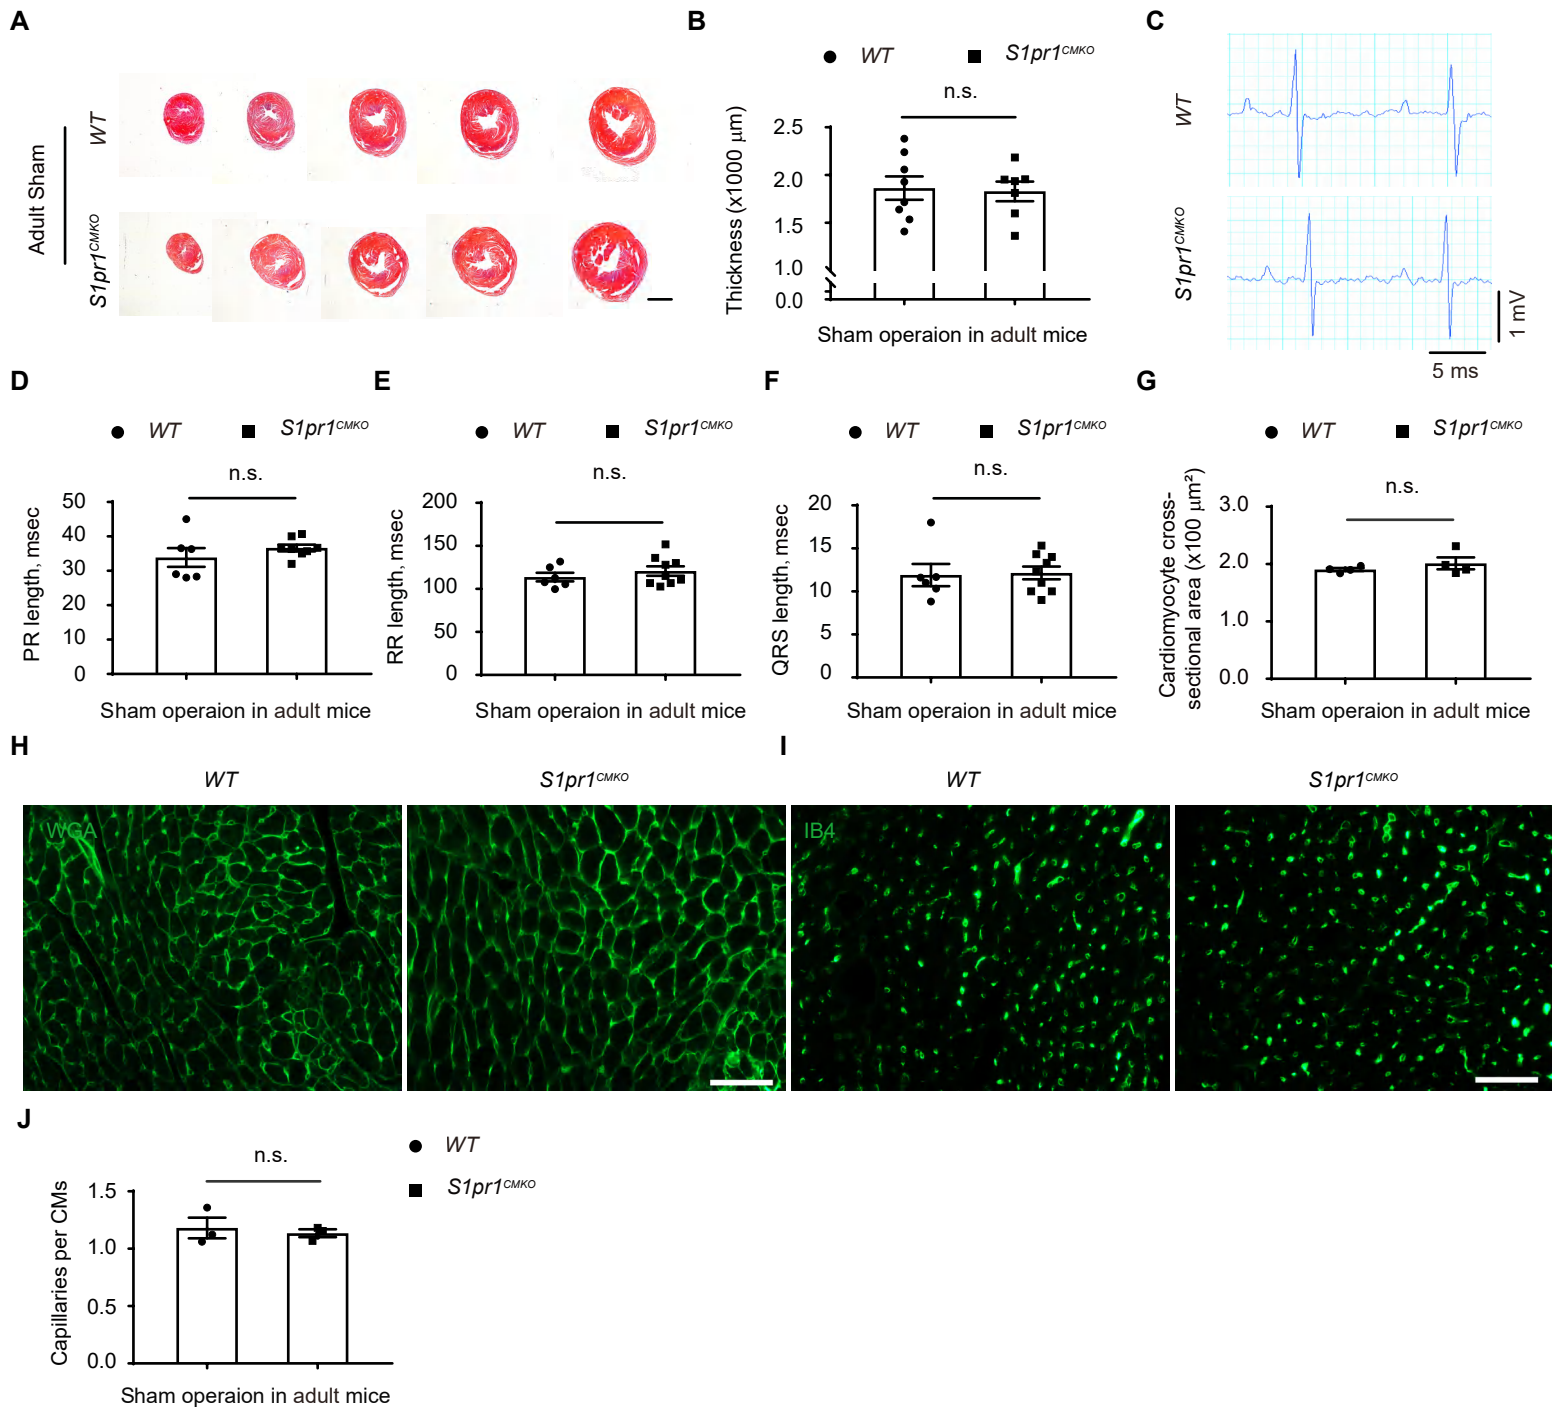

**Supplementary Figure 3. Cardiomyocyte S1PR1 deletion didn't affect heart morphology and heart rhythm.** **A.** Representative images of Masson's Trichrome staining of adult sham hearts of *WT* and *S1pr1<sup>CMKO</sup>* mice ( $n = 6$ ). **B.** Quantification of the thickness of compact myocardium (CM) of sham hearts from *WT* and *S1pr1<sup>CMKO</sup>* adult mice ( $n = 7-8$ ). **C-F.** Representative images of electrocardiogram (**C**) and quantification of the length of PR interval (**D**), RR interval (**E**), and QRS interval (**F**) of sham hearts from *WT* and *S1pr1<sup>CMKO</sup>* adult mice ( $n = 6-9$ ). **G-H.** Representative images of WGA (green) staining of sham hearts from *WT* and *S1pr1<sup>CMKO</sup>* adult mice and quantification of cross-sectional size of CMs ( $n = 4$ ). **I-J.** Representative images of IB4 (green) staining of sham hearts of *WT* and *S1pr1<sup>CMKO</sup>* adult mice (**I**) and quantification of capillary density (**J**) ( $n = 3$ ). WGA, wheat germ agglutinin. IB4, biotinylated-isolectin B4. Data are represented as means  $\pm$  S.E.M.  $P < 0.05$  indicates significant statistical differences. n.s., no statistical significance. Unpaired Student's t-test (**B**, **D-G**, and **J**). Scale bars: **A**, 2 mm, **H**, **I**, 50  $\mu$ m.

## Supplementary Figure 4

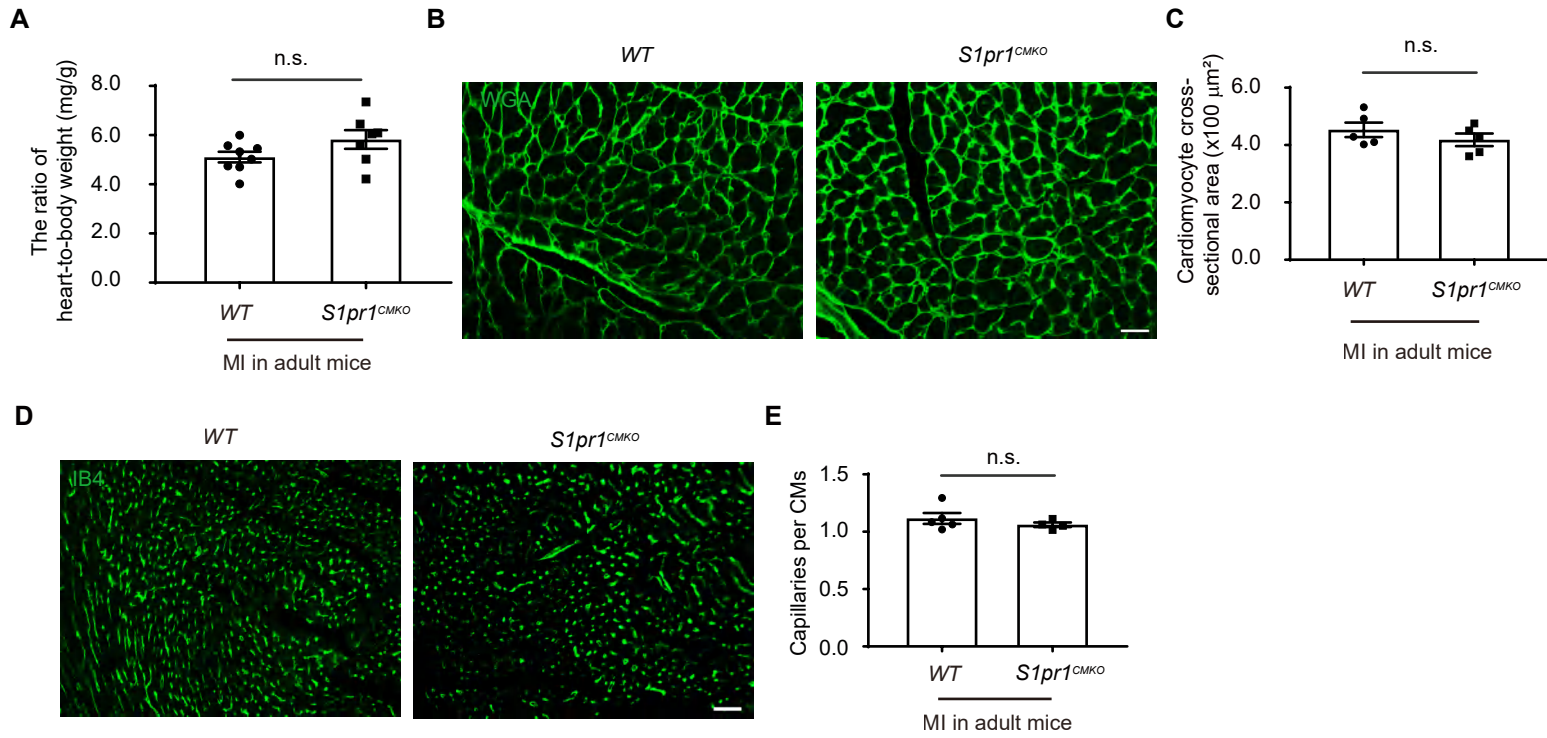

**Supplementary Figure 4. Cardiomyocyte S1PR1 deletion didn't influence cardiac hypertrophy and vascular density after adult myocardial infarction. A.** The ratio of heart weight to body weight of *WT* and *S1pr1<sup>CMKO</sup>* adult mice which underwent the MI operation at age of 8 weeks, and hearts were collected from these mice at 28-day post MI ( $n = 7-8$ ). **B-C.** Representative images of WGA (green) staining of *WT* and *S1pr1<sup>CMKO</sup>* adult mice which underwent the MI operation at age of 8 weeks. Hearts sections were collected from these mice at 28-day post MI (**B**) and quantification of cross-sectional size of CMs (**C**) ( $n = 5$ ). **D-E.** Representative images of IB4 (green) staining of *WT* and *S1pr1<sup>CMKO</sup>* adult mice which underwent the MI operation at age of 8 weeks. Hearts sections were collected from these mice at 28-day post MI (**D**), and quantification of capillary density (**E**) ( $n = 5$ ). WGA, wheat germ agglutinin. IB4, biotinylated-isolectin B4. Data are represented as means  $\pm$  S.E.M.  $P < 0.05$  indicates significant statistical differences. n.s. indicates no statistical significance. Unpaired Student's t-test (**A**, **C** and **E**). Scale bars: **B**, **D**, 50  $\mu\text{m}$ .

## Supplementary Figure 5

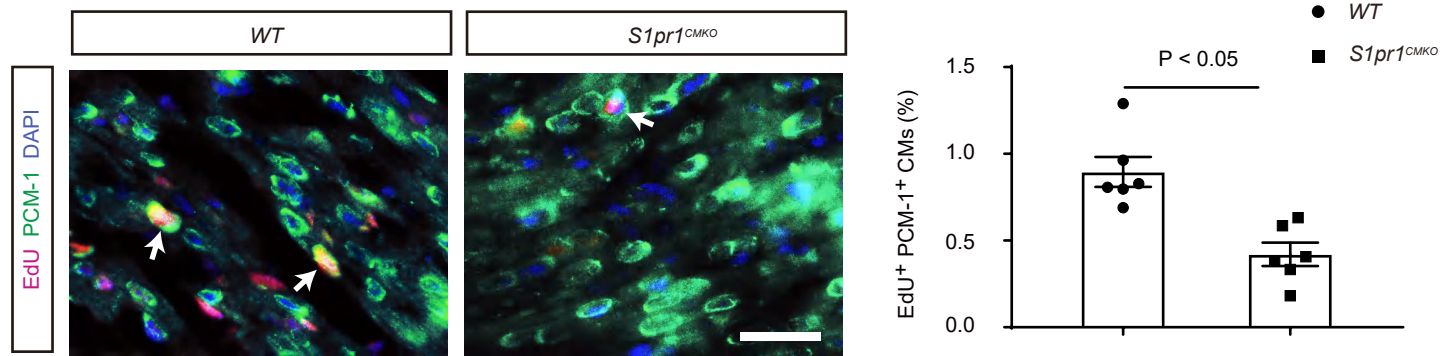

**Supplementary Figure 5. The cardiomyocyte-specific loss of S1PR1 inhibits cardiac proliferation after MI in adult mice.** Representative immunostaining images on peri-infarct sections for EdU and PCM1 positive cardiomyocytes of injured hearts from *WT* and *S1pr1<sup>CMKO</sup>* mice which underwent the MI operation at age of 8 weeks. Hearts sections were collected from these mice at 7-day post MI. The arrows indicate PCM1 (green) cardiomyocytes positive for EdU (magenta). DAPI, nuclear staining (blue). Quantification of the percentage of EdU+PCM1+ on the right (n = 6). PCM1, Pericentriolar Material 1. EdU, 5-ethynyl-2'-deoxyuridine. Data are represented as means  $\pm$  S.E.M.  $P < 0.05$  indicates significant statistical differences. Unpaired Student's t-test. Scale bars: 25  $\mu$ m.

## Supplementary Figure 6

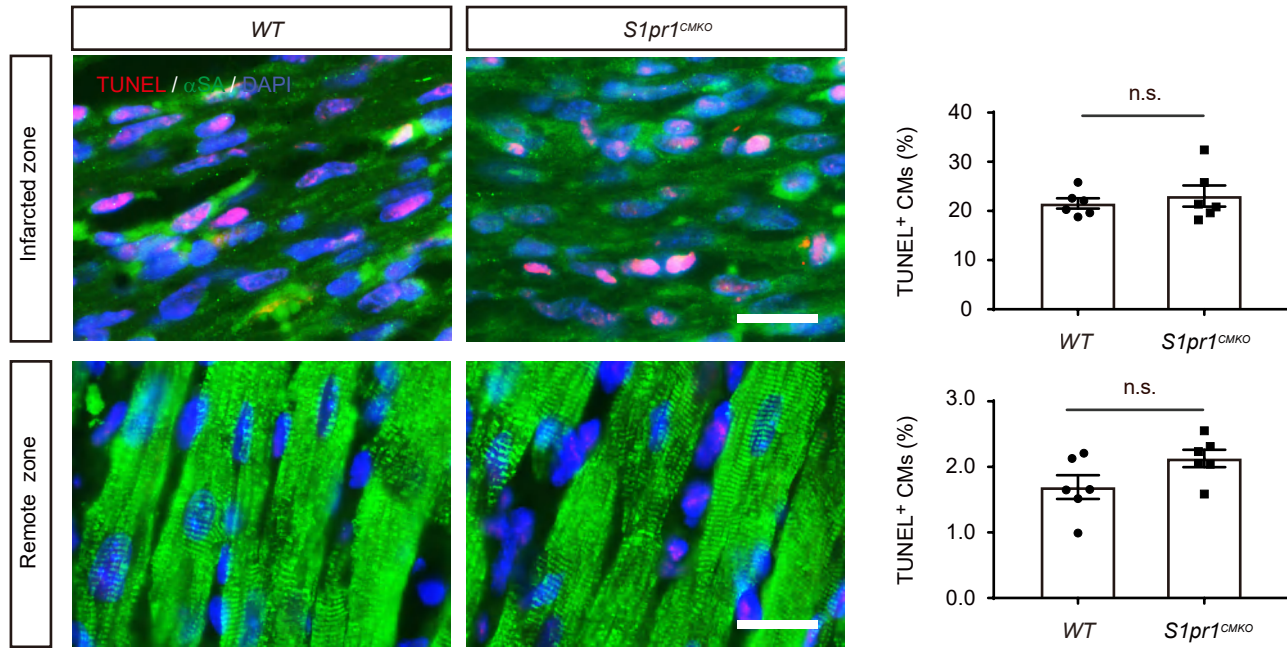

**Supplementary Figure 6. The cardiomyocyte-specific loss of S1PR1 didn't influence cardiac apoptosis in infarcted zone or remote zone of heart from adult mice post-MI.** Representative immunostaining images on sections for TUNEL and  $\alpha$ -SA positive cardiomyocytes of infarcted zone or remote zone of injured hearts from *WT* and *S1pr1<sup>CMKO</sup>* mice which underwent the MI operation at age of 8 weeks. Hearts sections were collected from these mice at 7-day post MI ( $n = 6$ ). The arrows indicate  $\alpha$ -SA (green) cardiomyocytes positive for TUNEL (magenta). DAPI, nuclear staining (blue). Quantification of the percentage of TUNEL<sup>+</sup> $\alpha$ -SA<sup>+</sup> cardiomyocytes on the right.  $\alpha$ -SA,  $\alpha$ -sacromeric actinin. Data are represented as means  $\pm$  S.E.M.  $P < 0.05$  indicates significant statistical differences. n.s., no statistical significance. Unpaired Student's t-test. Scale bars: 25  $\mu$ m.

## Supplementary Figure 7

**A**

GFP

cTNT

DAPI

Merge

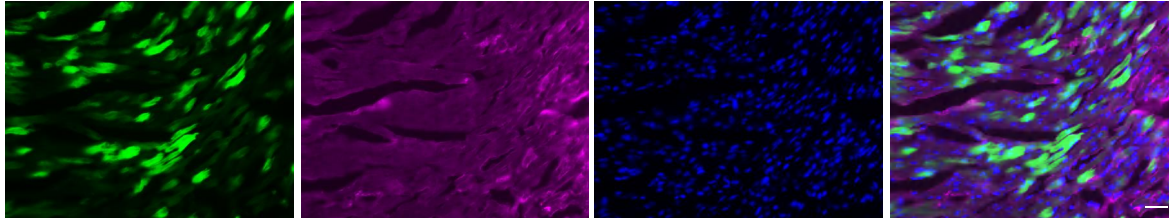

**B**

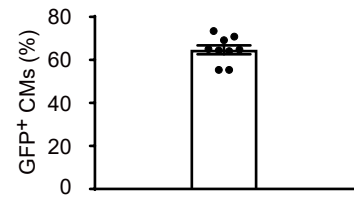

**Supplementary Figure 7. AAV9-cTnT-GFP achieved a high efficiency of CM-specific express target genes *in vivo*. A-B.** The representative images of GFP positive cells (green) and cTnT (magenta) positive cardiomyocytes of mice which underwent the AAV9-cTnT-GFP virus administration at postnatal day 1 (P1) (**A**). Hearts sections were collected from these mice at 7-day post-infection. The quantification of GFP<sup>+</sup> cTnT<sup>+</sup> cells (%) as the efficiency of AAV infection was shown in **B** (n = 9). DAPI, nuclear staining (blue). cTnT, cardiac troponin T. Data are represented as means  $\pm$  S.E.M. Scale bar: **A**, 50  $\mu$ m.



# Supplementary Figure 8

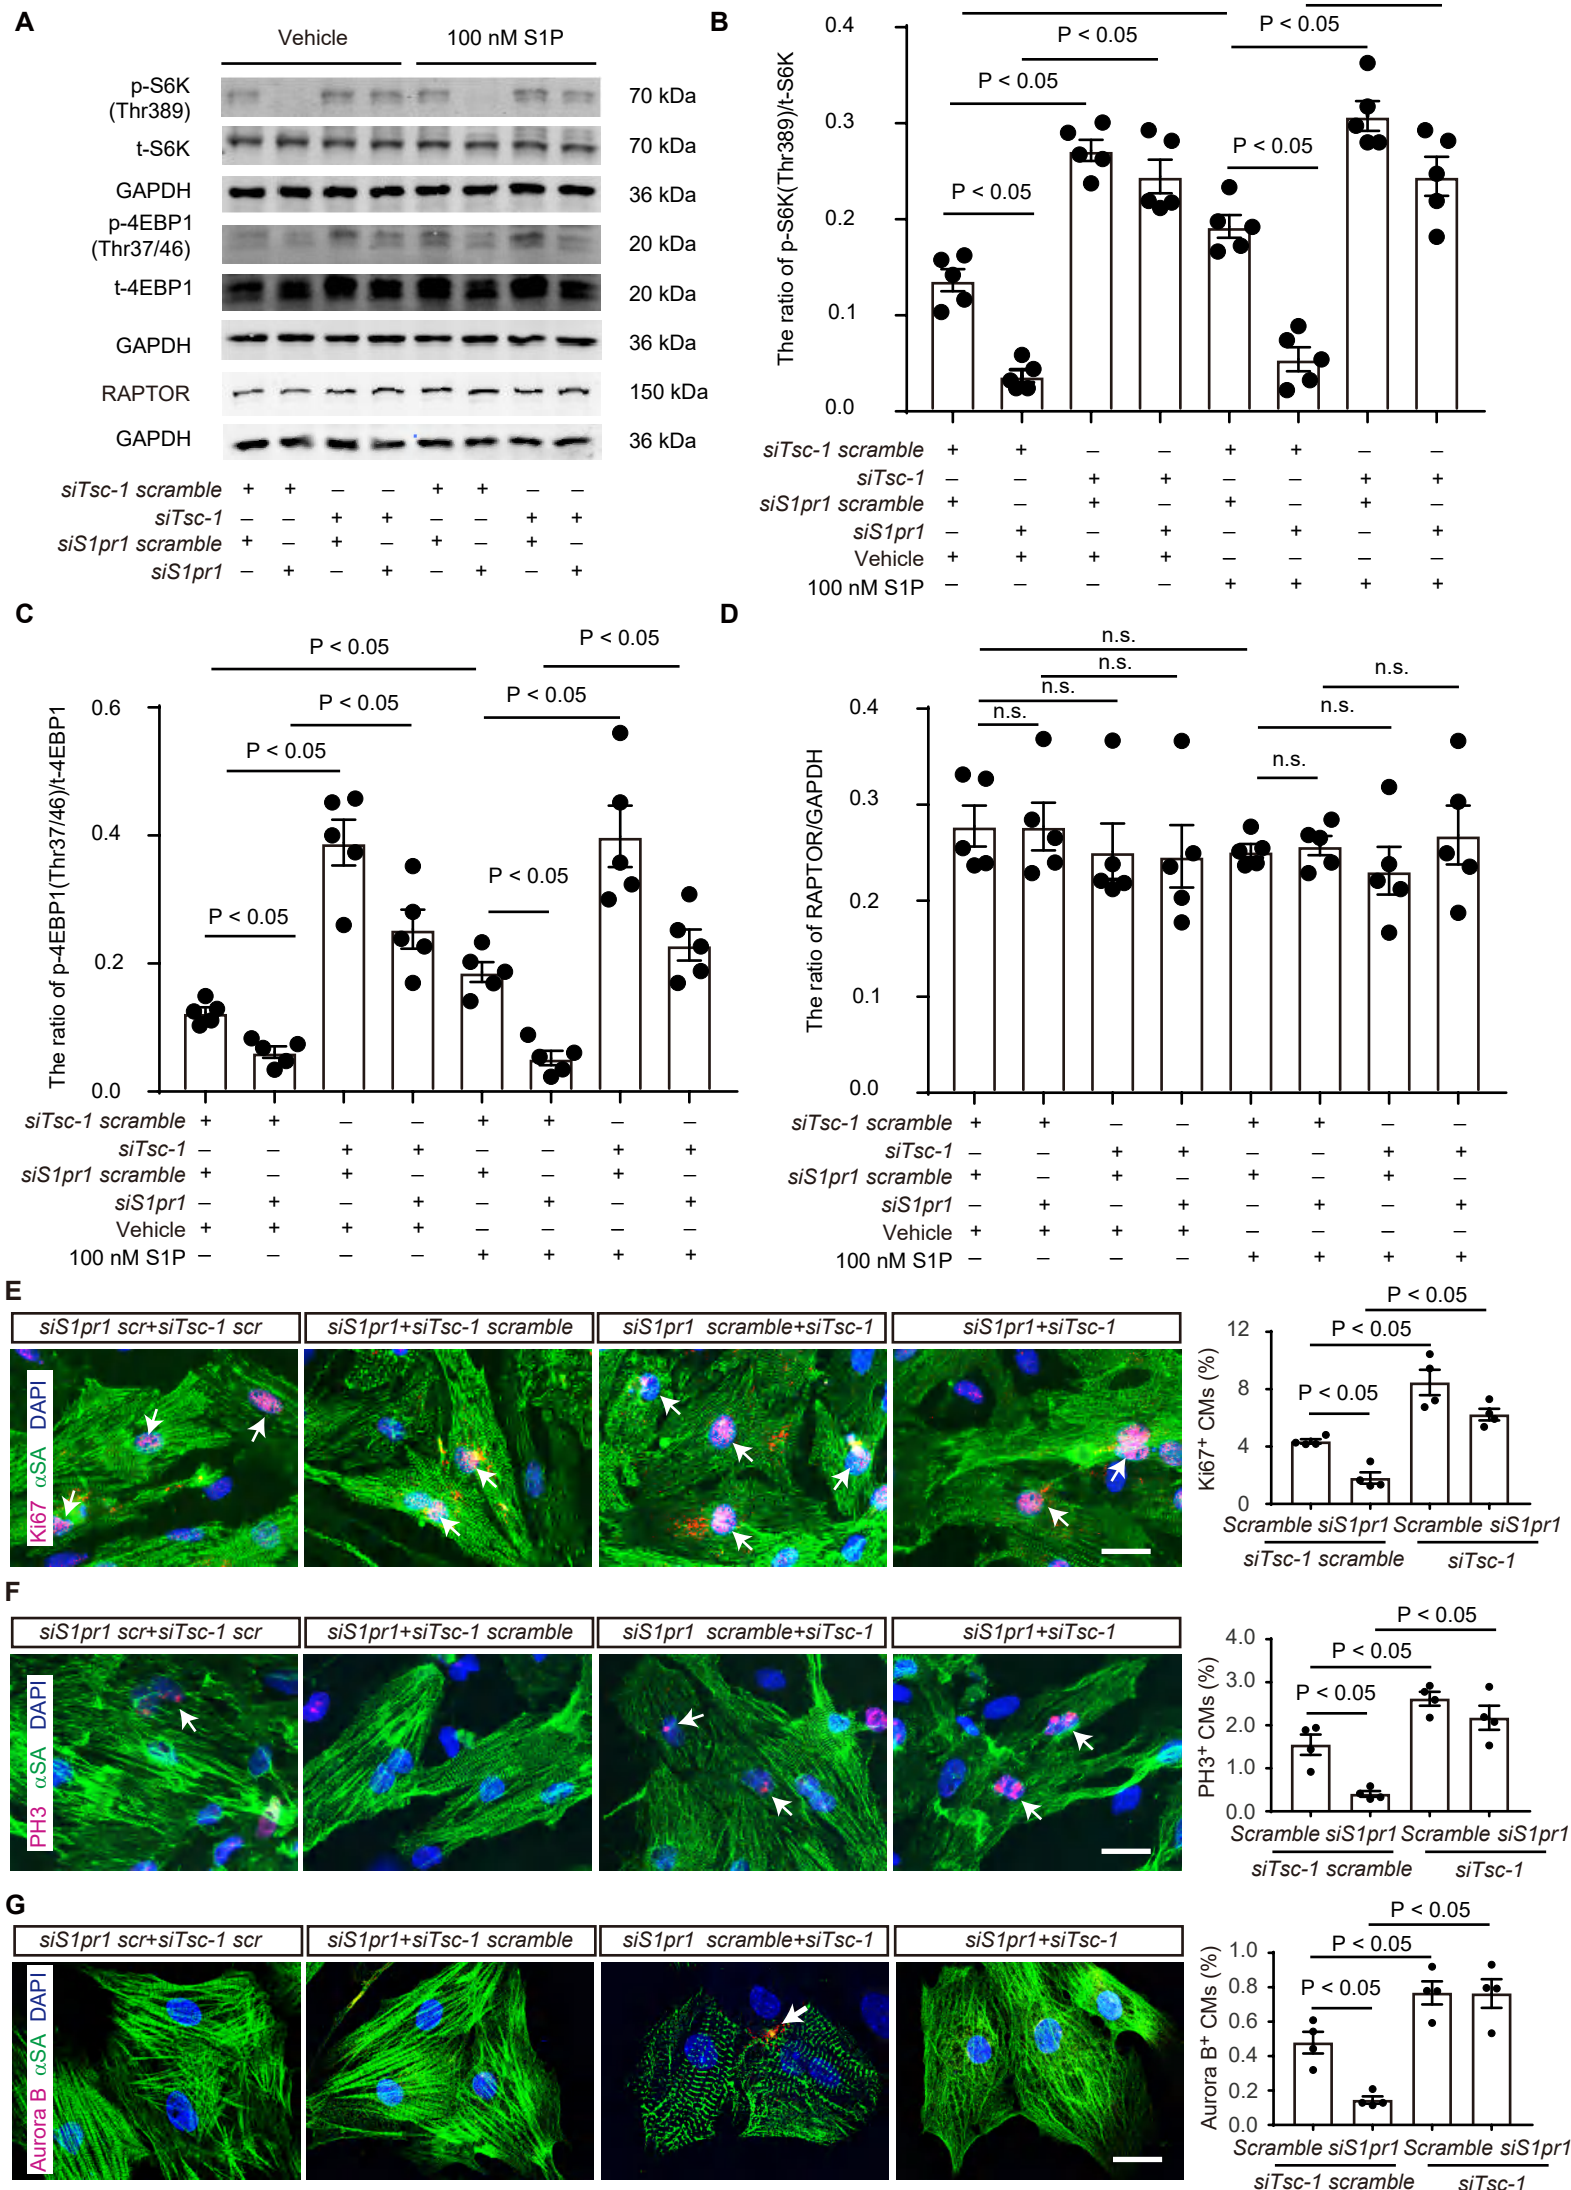

## Supplementary Figure 8 (Continued)

**Supplementary Figure 8. S1PR1 knockdown decreases cardiomyocyte proliferation via AKT/mTORC1 signaling pathways. A-D.** Western blot analysis of total and phosphorylated S6K (Thr389), total and phosphorylated 4EBP1 (Thr37/46) and RAPTOR protein levels in neonatal mouse cardiomyocytes (NMCMs) which were starved overnight and treated with or without *S1pr1-siRNA* or *Tsc1-siRNA* (**A**) before stimulation with vehicle or 100 nM S1P. The activity and expression levels were shown by quantification of the ratios of phosphorylated S6K (Thr389) to total S6K, p-S6K(Thr389)/t-S6K (**B**), the ratios of phosphorylated 4EBP1 (Thr37/46) to total 4EBP1, p-4EBP1(Thr37/46)/t-4EBP1 (**C**) and the ratios of RAPTOR to GAPDH (RAPTOR/GAPDH) (**D**) (n = 5). **E-G.** Representative immunostaining images of  $\alpha$ -SA positive neonatal mouse cardiomyocytes (NMCMs) treated with or without *S1pr1-siRNA* and *Tsc1-siRNA*. The arrows indicate  $\alpha$ -SA (green) cardiomyocytes positive for Ki67 (magenta), PH3 (magenta) or Aurora B (magenta). DAPI, nuclear staining (blue). Quantification of the percentage of Ki67<sup>+</sup> $\alpha$ -SA<sup>+</sup> (**E**), PH3<sup>+</sup> $\alpha$ -SA<sup>+</sup> (**F**) and Aurora B<sup>+</sup> $\alpha$ -SA<sup>+</sup> (**G**) cardiomyocytes (n = 4).  $\alpha$ -SA,  $\alpha$ -sacromeric actinin. PH3, phospho-histone H3. *siS1pr1 scr*, *siS1pr1 scramble*. *siTsc-1 scr*, *siTsc-1 scramble*. *siS1pr1*, *S1pr1-siRNA*. *siTsc-1*, *Tsc1-siRNA*. S6K, ribosomal S6 kinase. 4EBP1, eIF4E-binding protein 1. RAPTOR, regulatory-associated protein of mammalian target of rapamycin. Data are represented as means  $\pm$  S.E.M. P < 0.05 indicates significant statistical differences. Scale bars: **E-G**, 15  $\mu$ m. One-way ANOVA (**B-G**).

# Supplementary Figure 9

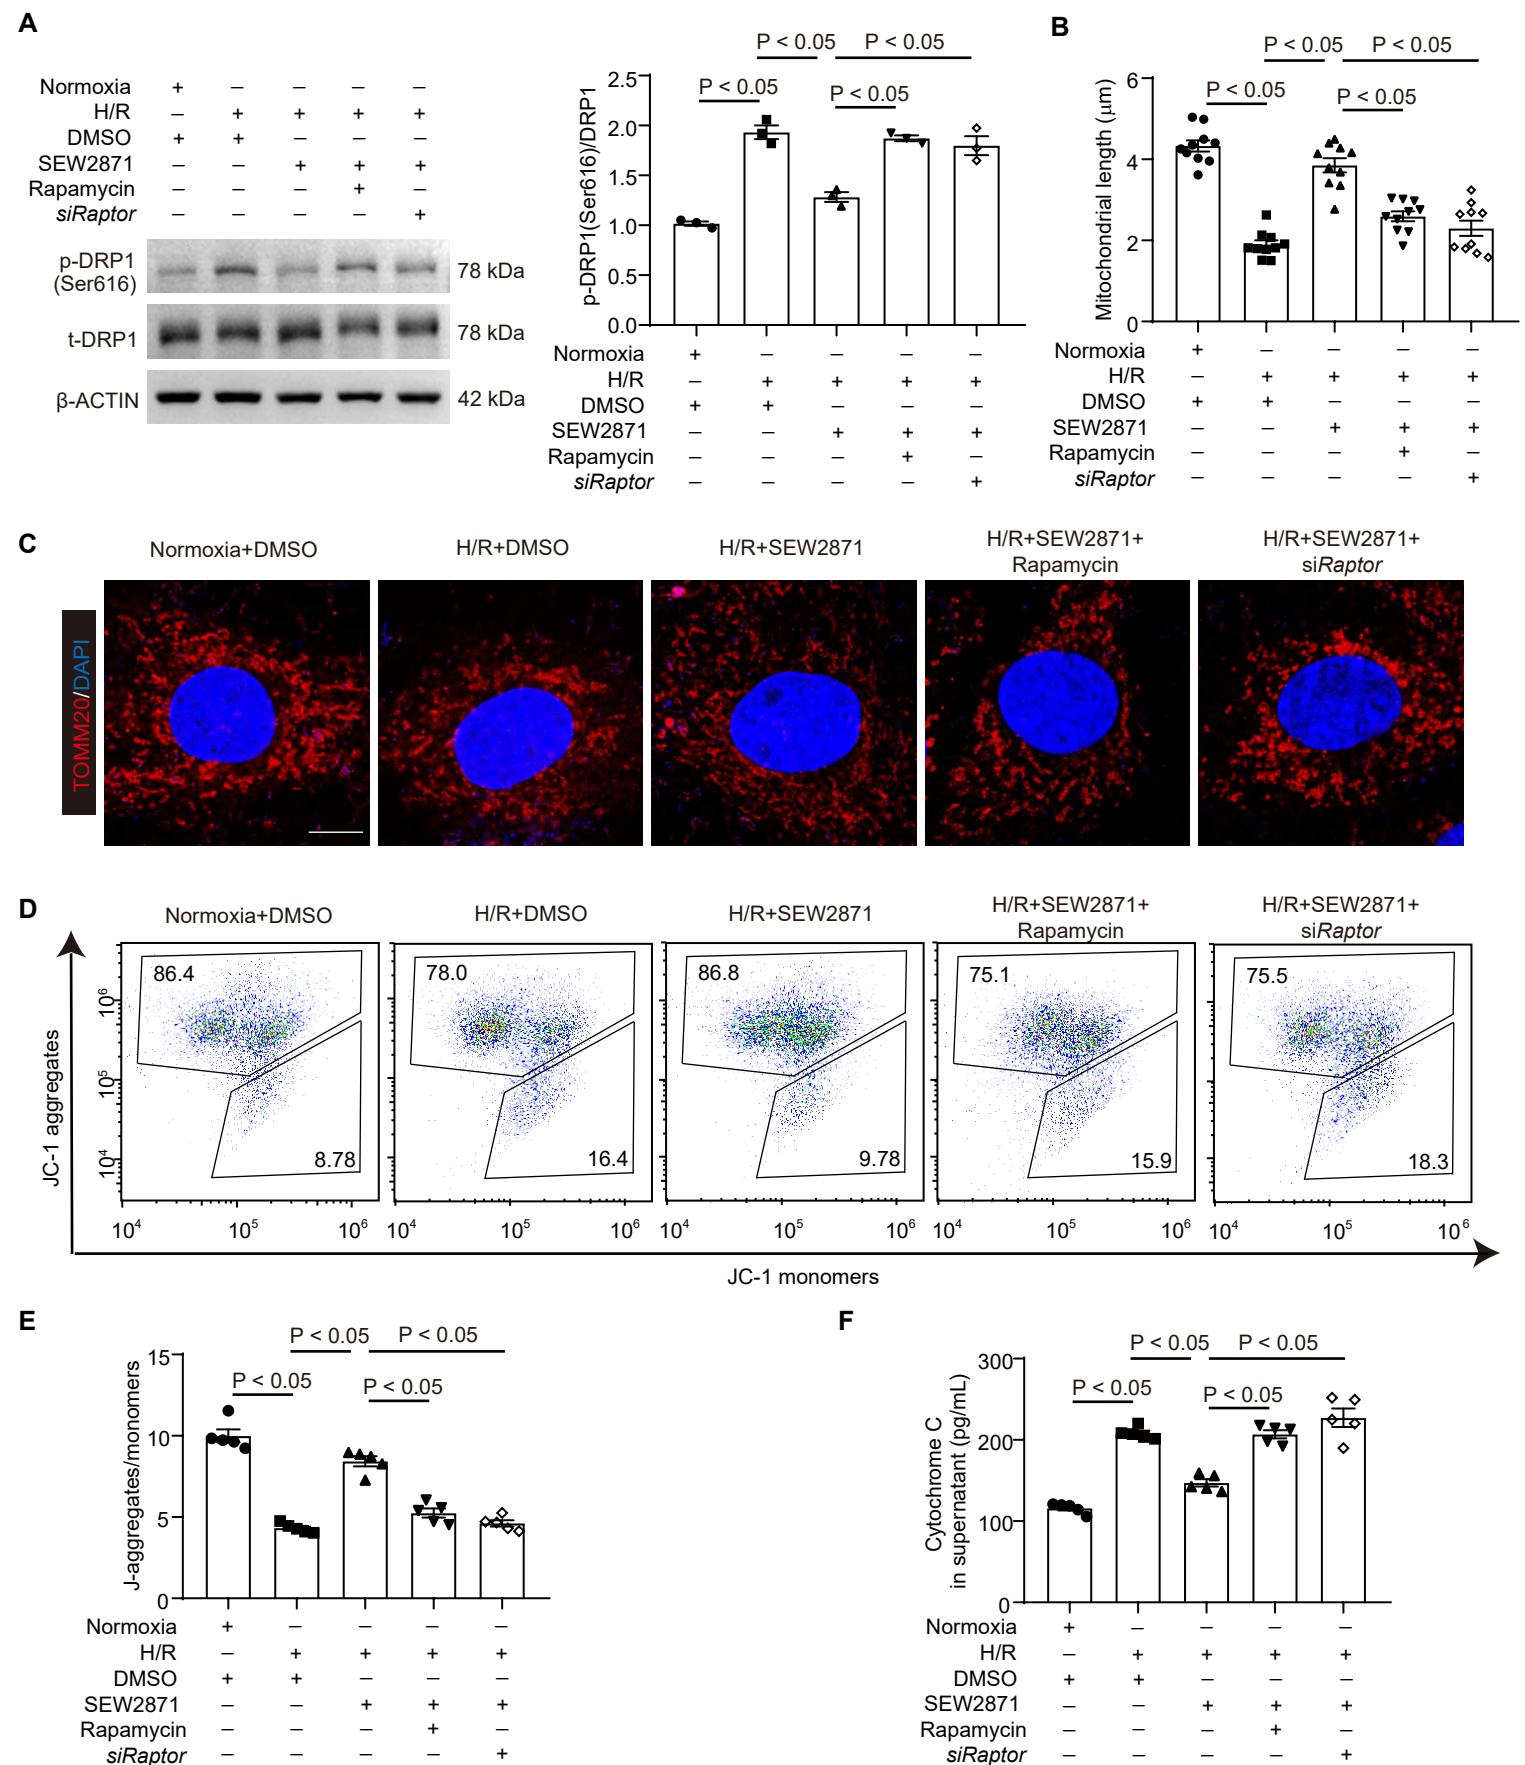

**Supplementary Figure 9. S1PR1 attenuates mitochondrial hyperfission to inhibit cardiomyocyte apoptosis by mTORC1 signaling.** **A.** Western blot analysis was conducted to assess the levels of total and phosphorylated DRP1 (Ser616) in MCMs treated with or without SEW2871, Rapamycin or Raptor-siRNA under the normoxia or 24h-hypoxia/12h-reoxygenation condition, with quantification of the ratio of p-DRP1(Ser616)/t-DRP1 (n=3). **B-C.** The representative images of the Tomm20 staining to visualize mitochondrial morphology in mouse cardiomyocytes (MCMs) treated with or without SEW2871, Rapamycin or Raptor-siRNA under the normoxia or 24h-hypoxia/12h-reoxygenation condition (**C**). Quantification of mitochondrial length (n = 10) in the indicated groups (**B**). **D-E.** The representative images of flow cytometric analysis of JC-1 staining in MCMs treated with or without SEW2871, Rapamycin or Raptor-siRNA under the normoxia or 24h-hypoxia/12h-reoxygenation condition for the detection of mitochondrial membrane potential changes (**D**). Quantification of the ratio of J-aggregates to monomer (n = 5) in the indicated groups (**E**). **F.** Cytochrome C in supernatant of MCMs treated with or without SEW2871, Rapamycin or Raptor-siRNA under the normoxia or 24h-hypoxia/12h-reoxygenation condition were determined by ELISA (n = 5). TOMM20, translocase of outer mitochondrial membrane 20. H/R, 24-hour hypoxia/12-hour reoxygenation condition. CYCS, Cytochrome C. SEW2871, S1PR1 agonist. Rapamycin, mTOR1 inhibitor. JC-1, 5,5',6,6'-Tetrachloro-1,1',3,3'-tetraethylbenzimidazolcarbocyanine iodide. DRP1, dynamin-related protein 1. *siRaptor*, Raptor-siRNA. Data are represented as means ± S.E.M. P < 0.05 indicates significant statistical differences. Scale bar: **B**, 5 μm. One-way ANOVA (**A-B**, and **E-F**).

**Supplementary Figure 10**

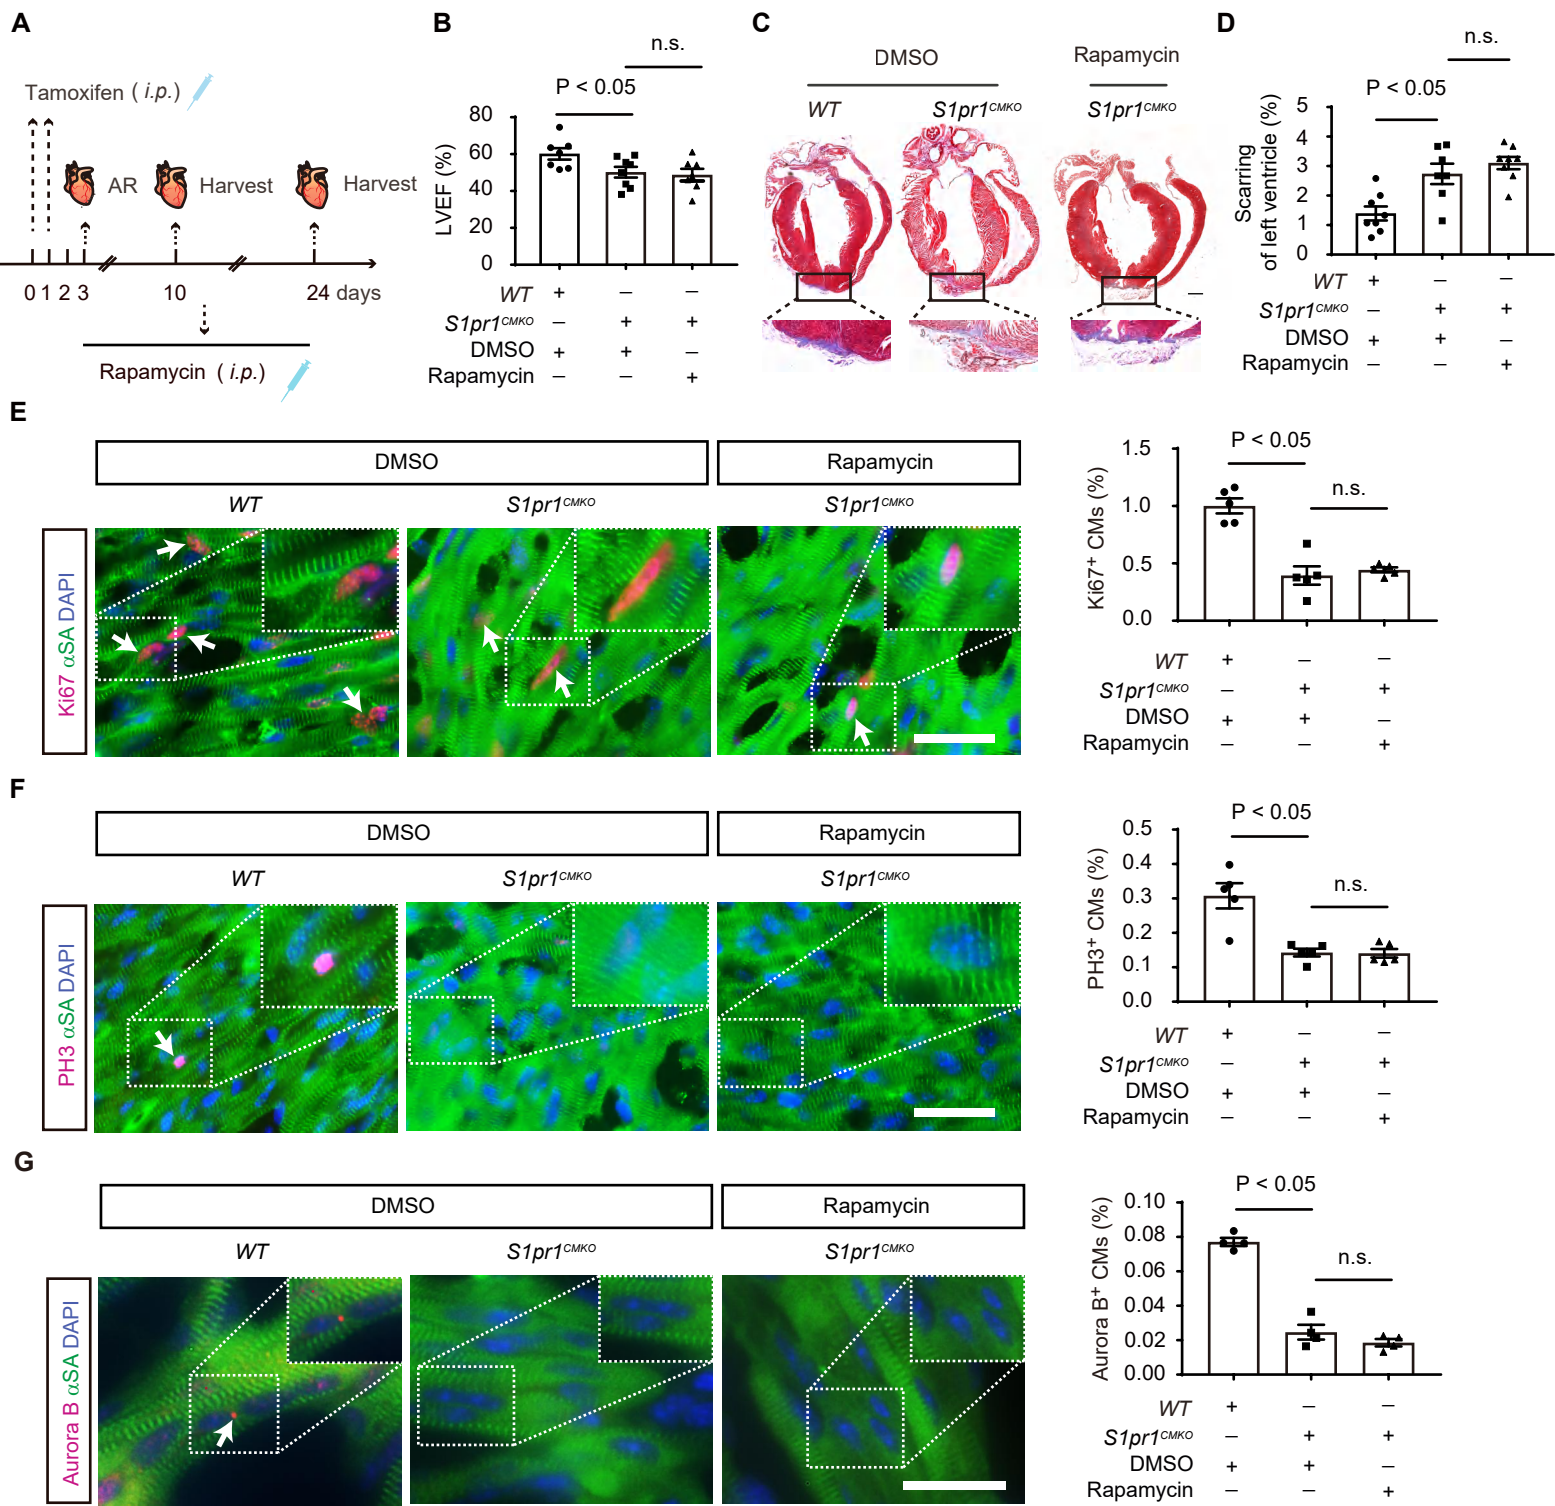

**Supplementary Figure 10. The effect of rapamycin on cardiac regeneration in *S1pr1<sup>CMKO</sup>* neonatal mice after AR.** **A.** Schematic diagram of generation of cardiomyocyte-specific *S1pr1* knockout mice (*S1pr1<sup>CMKO</sup>*), and tamoxifen (dosed at 40  $\mu$ g daily) were administered to neonatal mice from postnatal day 0 to 1 to induce specific deletion of *S1pr1* in CMs following with apical resection (AR) at postnatal day 3 (P3). DMSO or rapamycin was administered to *S1pr1<sup>CMKO</sup>* mice every day (2 mg/kg body weight, *i.p.*) post AR operation. Hearts tissues were harvested from wild-type (*WT*) and *S1pr1<sup>CMKO</sup>* mice at designated post-AR time points (7-day and 21-day). **B.** Quantitative assessment of left ventricle ejection fraction (LVEF%) in wild-type (*WT*) and *S1pr1<sup>CMKO</sup>* mice which underwent the AR operation at postnatal day 3 (P3) with or without rapamycin treatment were performed at 21-day post AR using echocardiography (n = 7-8). **C-D.** Representative images of Masson's Trichrome staining in *WT* and *S1pr1<sup>CMKO</sup>* mice which underwent the AR operation at postnatal day 3 (P3) with or without rapamycin treatment. Hearts sections were collected from these mice at 21-day post AR (**C**), and quantification of the percentage of cardiac scars in left ventricle (n = 7-8) (**D**). **E-F.** Representative immunostaining images on heart sections for Ki67 (**E**) or PH3 (**F**) and  $\alpha$ -SA positive cardiomyocytes within the border zone of hearts from *WT* and *S1pr1<sup>CMKO</sup>* mice which underwent the AR operation at postnatal day 3 (P3) with or without rapamycin treatment. Hearts sections were collected from these mice at 7-day post AR. The arrows indicate  $\alpha$ -SA (green) cardiomyocytes positive for Ki67 (magenta) or PH3 (magenta). DAPI, nuclear staining (blue). Quantification of the percentage of Ki67<sup>+</sup> $\alpha$ -SA<sup>+</sup> or PH3<sup>+</sup> $\alpha$ -SA<sup>+</sup> cardiomyocytes on the right (n = 4-5).  $\alpha$ -SA,  $\alpha$ -sacromeric actinin. PH3, phospho-histone H3. Data are represented as means  $\pm$  S.E.M. P < 0.05 indicates significant statistical differences. n.s. indicates no statistical significance. One-way ANOVA (**B**, **D**, and **E-G**). Scale bars: **C**, 2 mm; **E-G**, 15  $\mu$ m.

Supplementary Figure 11

**A**

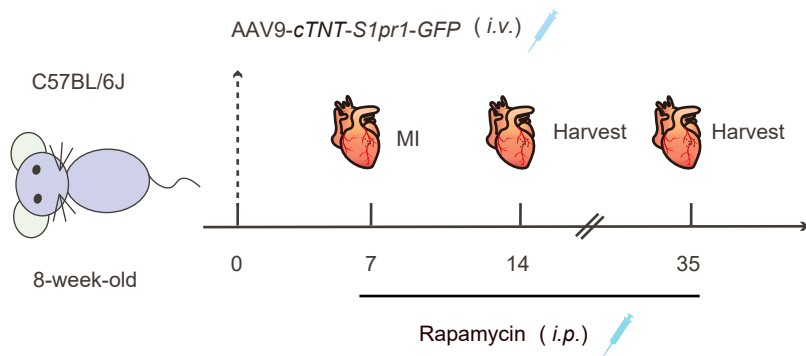

**B**

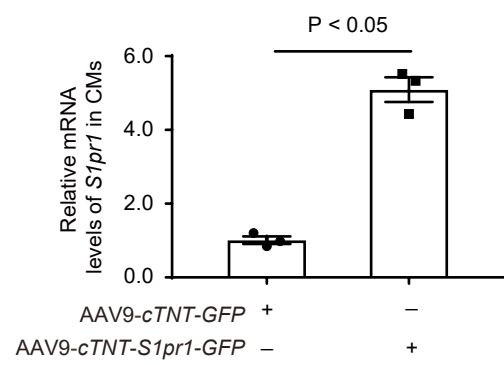

**C**

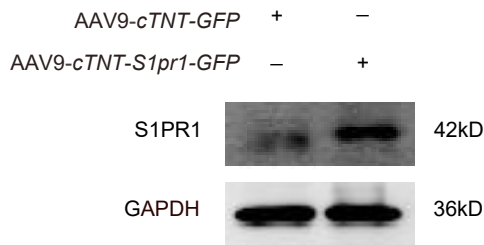

**D**

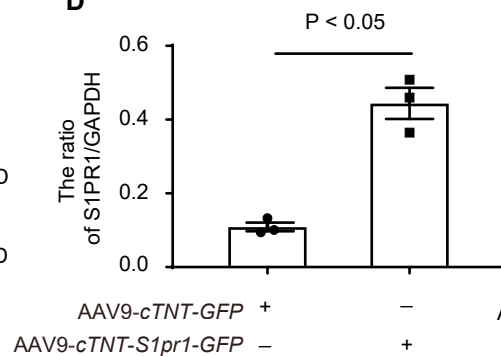

**E**

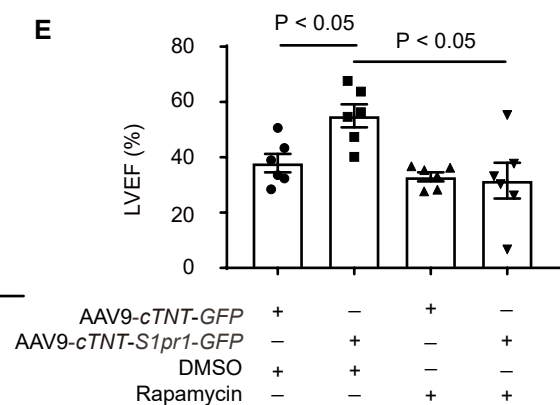

**F**

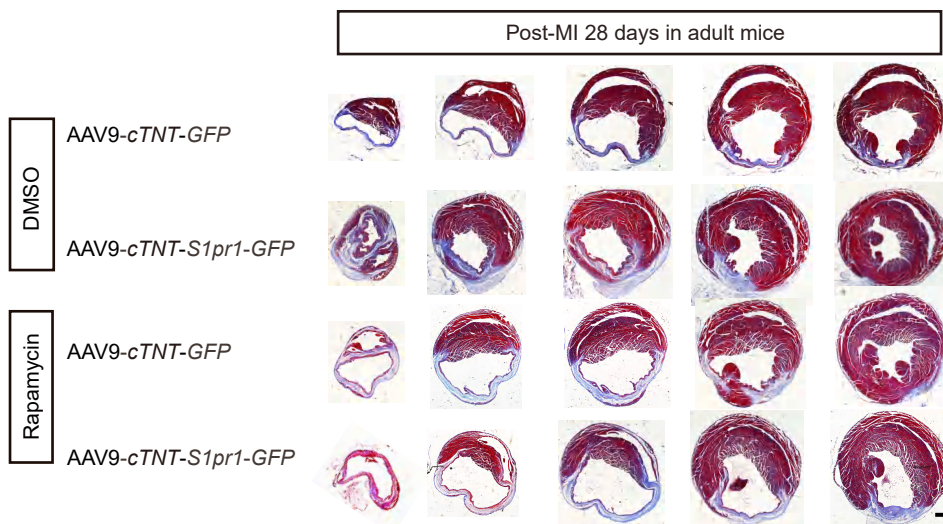

**G**

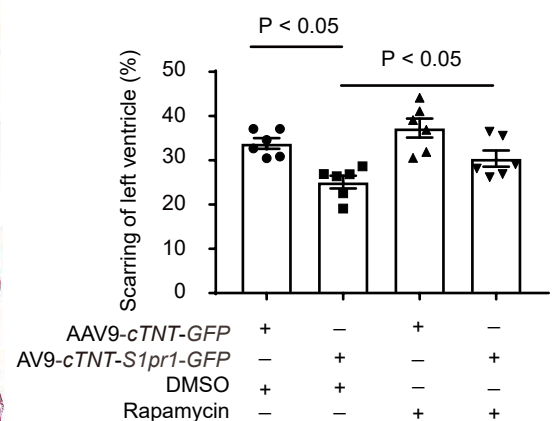

**H**

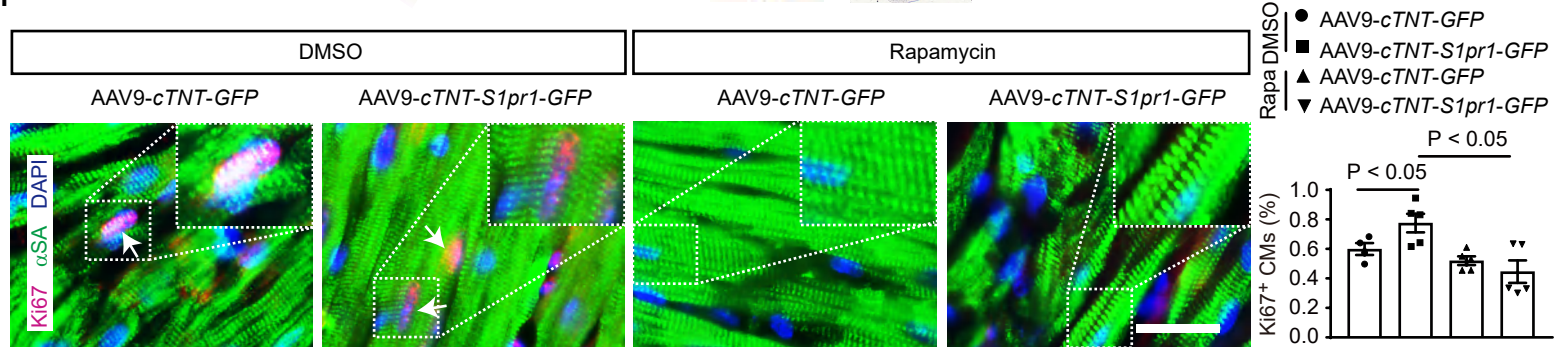

**I**

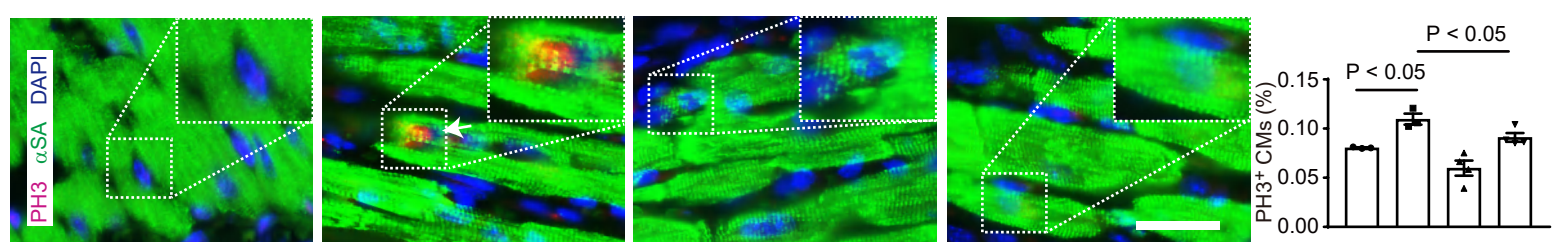

**J**

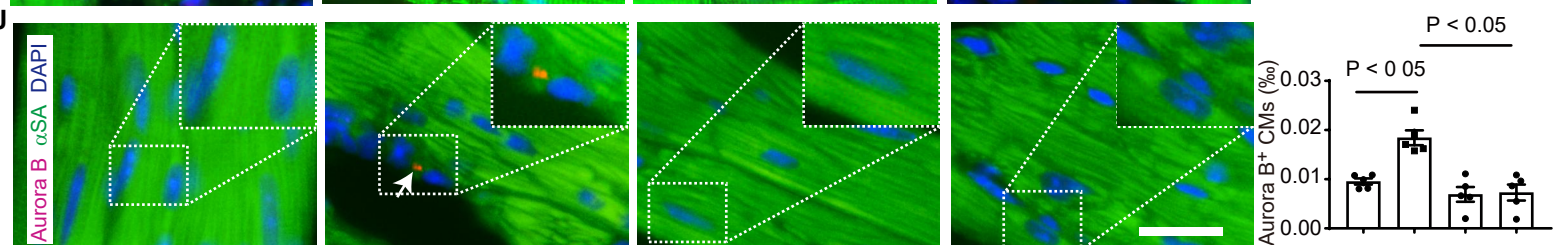

## Supplementary Figure 11 (Continued)

**Supplementary Figure 11. S1PR1 overexpression increases cardiomyocyte proliferation via mTORC1 signaling pathways in adult mice.** **A.** Schematic diagram for experimental procedure, AAV9-*cTnT-S1pr1-GFP* driven by *cTnT* promoter were administered to 8-week-old mice to achieve cardiomyocyte (CM)-specific S1PR1 overexpression, following by myocardial infarction (MI) operation at 7-day after AAV administration. Rapamycin was administered every day (2 mg/kg bodyweight, *i.p.*) post MI operation and EdU was administered daily for 3 consecutive days beginning from 4-day post-MI. Hearts tissues from sham-operated and MI-operated mice were harvested at designated post-MI time points (7-day, 28-day). **B.** Relative mRNA expression levels of *S1pr1* in CMs of the indicated groups from the adult mice infected with AAV9-*cTnT-GFP* or AAV9-*cTnT-S1pr1-GFP* ( $4 \times 10^{11}$  viral genome particles per mouse, *i.p.*) ( $n = 3$ ). **C-D.** Western blot analysis of S1PR1 protein levels in CMs from the adult mice infected with AAV9-*cTnT-GFP* or AAV9-*cTnT-S1pr1-GFP* ( $n = 3$ ). **E.** Quantitative assessment of left ventricle ejection fraction (LVEF%) in AAV9-*cTnT-S1pr1-GFP* and AAV9-*cTnT-GFP* adult mice which underwent the MI operation at age of 8 weeks with or without rapamycin treatment were performed at 28-day post MI using echocardiography. ( $n = 6$ ). **F-G.** Representative images of Masson's Trichrome staining in AAV9-*cTnT-S1pr1-GFP* and AAV9-*cTnT-GFP* mice which underwent the MI operation at age of 8 weeks. Hearts sections were collected from these mice at 28-day post MI (**F**), and quantification of the percentage of cardiac scar area in left ventricles on the right ( $n = 6$ ) (**G**). **H-J.** Representative immunostaining images on peri-infarct sections for Ki67 (**H**), PH3 (**I**) or Aurora B (**J**) and  $\alpha$ -SA positive cardiomyocytes of hearts from AAV9-*cTnT-S1pr1-GFP* or AAV9-*cTnT-GFP* mice which underwent the MI operation at age of 8 weeks. Hearts sections were collected from these mice at 7-day post MI. The arrows indicate  $\alpha$ -SA (green) cardiomyocytes positive for Ki67 (magenta), PH3 (magenta) or Aurora B (magenta). DAPI, nuclear staining (blue). Quantification of the percentage of Ki67<sup>+</sup> $\alpha$ -SA<sup>+</sup>, PH3<sup>+</sup> $\alpha$ -SA<sup>+</sup>, EdU<sup>+</sup> $\alpha$ -SA<sup>+</sup>, Aurora B<sup>+</sup> $\alpha$ -SA<sup>+</sup> and TUNEL<sup>+</sup> $\alpha$ -SA<sup>+</sup> cardiomyocytes on the right.  $\alpha$ -SA,  $\alpha$ -sacromeric actinin. PH3, phospho-histone H3. Rapamycin (Rapa), mTOR inhibitor. Data are represented as means  $\pm$  S.E.M.  $P < 0.05$  indicates significant statistical differences. One-way ANOVA (**E** and **G-J**). Unpaired Student's *t*-test (**B** and **D**). Scale bars: **C**: 2 mm; **H-J**, 25  $\mu$ m.

Supplementary Figure 12

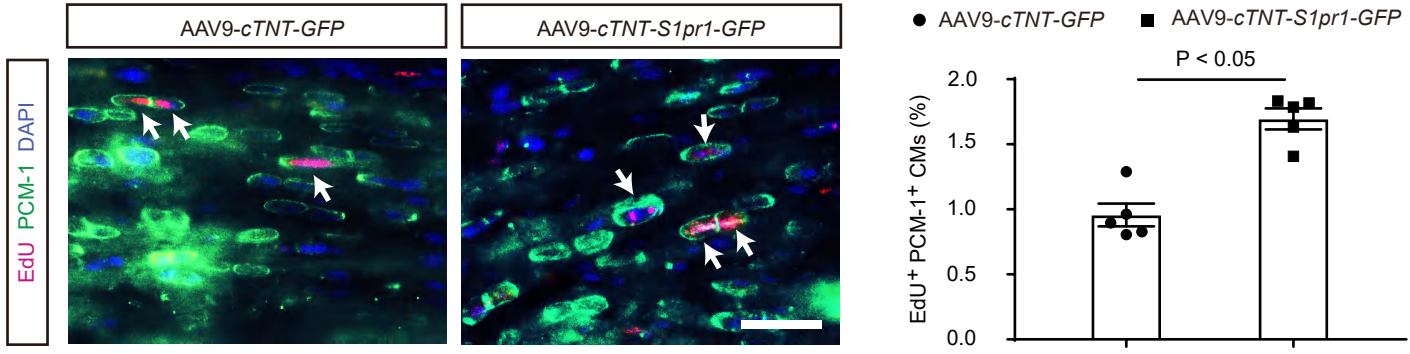

**Supplementary Figure 12. Overexpression of S1PR1 in cardiomyocytes promotes cardiac proliferation after MI in adult mice.** Representative immunostaining images on peri-infarct sections for EdU and PCM1 positive cardiomyocytes of injured hearts from *AAV9-cTnT-S1pr-GFP* and *AAV9-cTnT-GFP* mice which underwent the MI operation at age of 8 weeks. Hearts sections were collected from these mice at 7-day post MI. The arrows indicate PCM1 (green) cardiomyocytes positive for EdU (magenta). DAPI, nuclear staining (blue). Quantification of the percentage of EdU+PCM1+ on the right (n = 5). PCM1, Pericentriolar Material 1. EdU, 5-ethynyl-2'-deoxyuridine. Data are represented as means  $\pm$  S.E.M. P < 0.05 indicates significant statistical differences. Unpaired Student's t-test. Scale bars: 25  $\mu$ m.

## Supplementary Figure 13

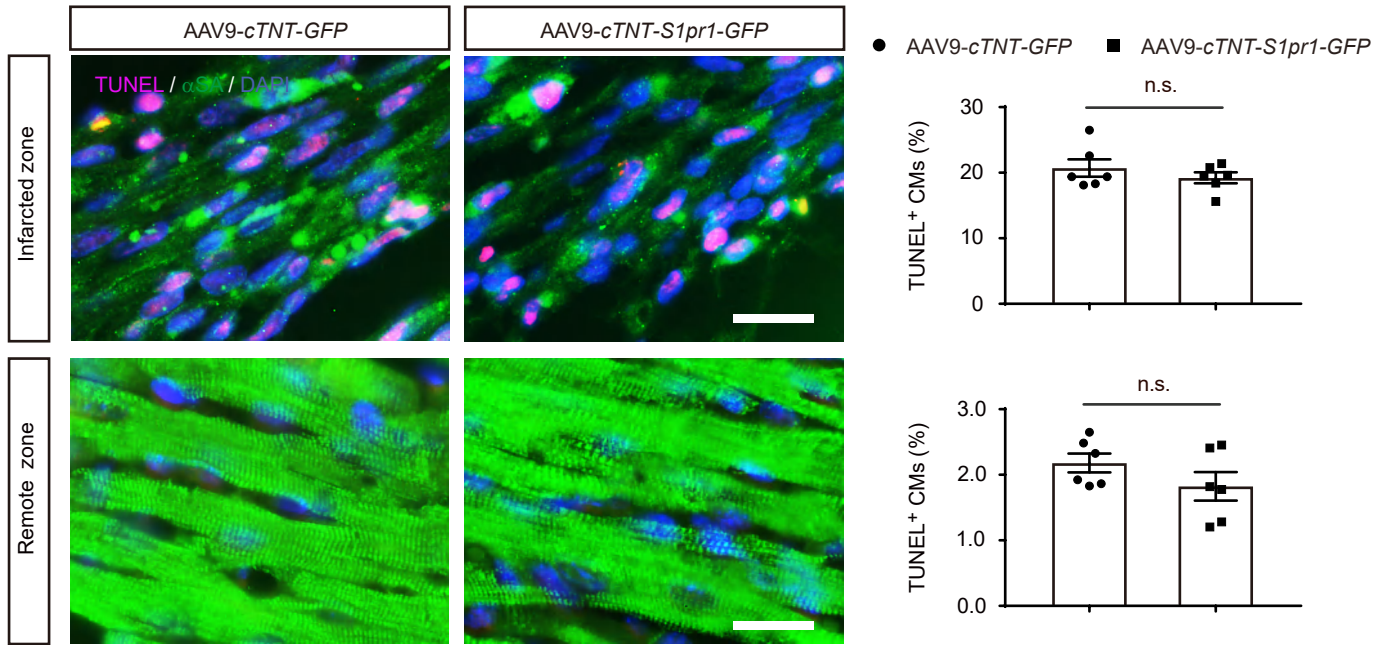

**Supplementary Figure 13. Overexpression of S1PR1 in cardiomyocytes didn't influence cardiac apoptosis in infarcted zone or remote zone of heart from adult mice post-MI.** Representative immunostaining images on sections for TUNEL and  $\alpha$ -SA positive cardiomyocytes of infarcted zone or remote zone of injured hearts from AAV9-cTnT-S1pr1-GFP and AAV9-cTnT-GFP mice which underwent the MI operation at age of 8 weeks. Hearts sections were collected from these mice at 7-day post MI (n = 6). The arrows indicate  $\alpha$ -SA (green) cardiomyocytes positive for TUNEL (magenta). DAPI, nuclear staining (blue). Quantification of the percentage of TUNEL<sup>+</sup> $\alpha$ -SA<sup>+</sup> cardiomyocytes on the right.  $\alpha$ -SA,  $\alpha$ -sacromeric actinin. Data are represented as means  $\pm$  S.E.M. P < 0.05 indicates significant statistical differences. n.s., no statistical significance. Unpaired Student's t-test. Scale bars: 25  $\mu$ m.



# Supplementary Figure 14

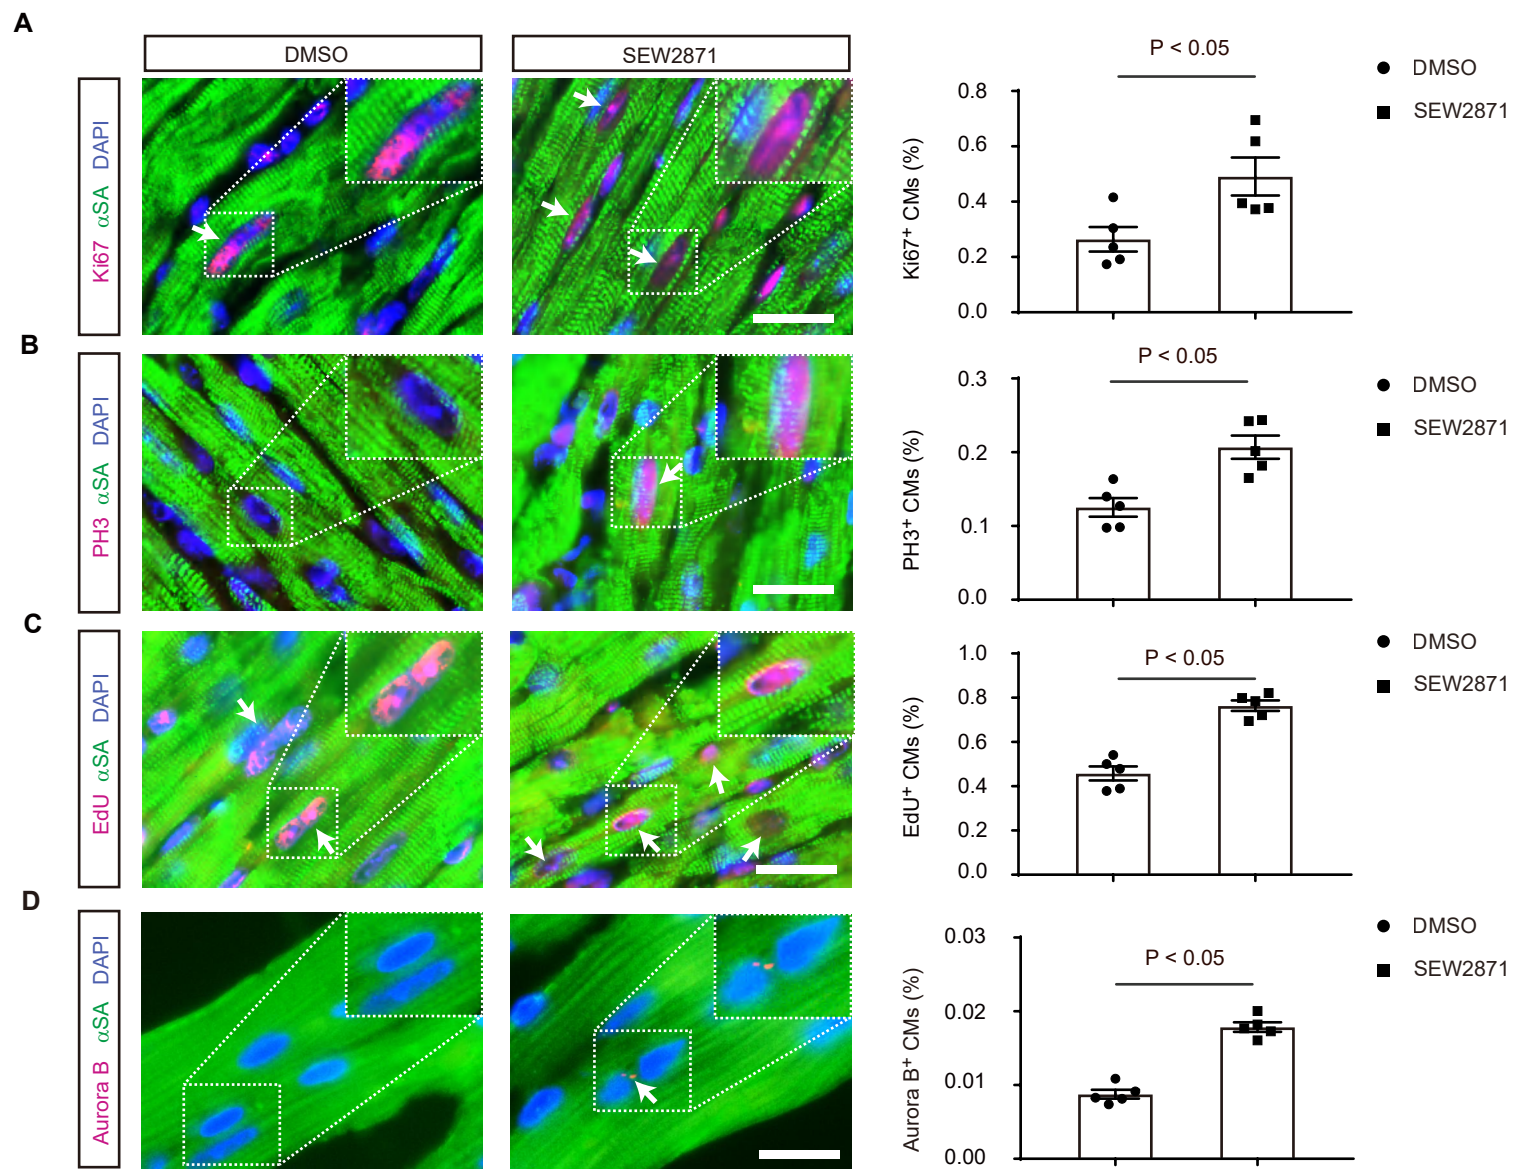

## Supplemental Tables

**Supplementary Table 1.** Antibodies used for western blot and immunostaining.

| Antibodies                                                         | Company     | Catalog Number   |
|--------------------------------------------------------------------|-------------|------------------|
| Anti-mouse $\alpha$ -sacromeric actinin ( $\alpha$ SA)             | Abcam       | Ab9465           |
| Anti-rabbit Tomm20                                                 | Abcam       | Ab56783          |
| Anti-rabbit PH3                                                    | Abcam       | Ab80612          |
| Anti-rabbit Ki67                                                   | Abcam       | Ab15580          |
| Anti-mouse Ki67                                                    | CST         | 9449S            |
| Anti-rabbit cTNT                                                   | Abcam       | Ab115134         |
| Anti-rabbit Aurora B                                               | Abcam       | Ab315206         |
| Anti-rabbit p-AKT (Ser473)                                         | CST         | 4060T            |
| Anti-rabbit t-AKT                                                  | CST         | 4060S            |
| Anti-rabbit BCL2                                                   | CST         | 3498T            |
| Anti-rabbit p-DRP1 (Ser616)                                        | CST         | 4494T            |
| Anti-rabbit DRP1                                                   | CST         | 8570T            |
| Anti-rabbit S1PR1                                                  | Invitrogen  | PA1-1040         |
| Anti-rabbit S1PR2                                                  | Proteintech | 21180-1-AP       |
| Anti-rabbit S1PR3                                                  | ABclonal    | A15664           |
| Anti-rabbit p-S6K (Thr389)                                         | ABclonal    | AP0564           |
| Anti-rabbit t-S6K                                                  | ABclonal    | A2190            |
| Anti-rabbit p-4EBP1 (Thr37/46)                                     | ABclonal    | AP1363           |
| Anti-rabbit t-4EBP1                                                | ABclonal    | A24691           |
| Anti-rabbit RAPTOR                                                 | ABclonal    | A21755           |
| Anti-rabbit GAPDH                                                  | Servicebio  | GB11002          |
| Anti-rabbit ACTB                                                   | Servicebio  | GB11001          |
| Alexa Fluor 488-conjugated donkey anti-mouse secondary antibodies  | Abcam       | Ab150113         |
| Alexa Fluor 488-conjugated donkey anti-rabbit secondary antibodies | Abcam       | Ab150077         |
| Alexa Fluor 594-conjugated donkey anti-rabbit secondary antibodies | Abcam       | Ab150116         |
| Alexa Fluor 594-conjugated donkey anti-mouse secondary antibodies  | Abcam       | Ab150108         |
| IRDye 800CW Goat Anti-Mouse IgG H&L                                | Bioss       | bs-40296G-IRDye8 |
| IRDye 800CW Goat Anti-Rabbit IgG H&L                               | Bioss       | bs-40295G-IRDye8 |

**Supplementary Table 2.** Primers sequences for siRNA.

| Gene Name       | Primer Sequences                                                                  |
|-----------------|-----------------------------------------------------------------------------------|
| <i>m-Bcl2</i>   | Sense: 5'-AUGAAUUACAAUUUUUCAGUCTT-3'<br>Anti-sense: 5'-CUGAAAAAUUGUAAUUCAUCUTT-3' |
| <i>m-Tsc-1</i>  | Sense: 5'-AUACUCAUUAAUUUUUGUCCAATT-3'<br>Anti-sense: 5'-GGACAAAAUUAUGAGUAUGUTT-3' |
| <i>m-S1pr1</i>  | Sense: 5'-ACUAUGAUAUCAUAGUUCCCATT-3'<br>Anti-sense: 5'-GGAACUAUGAUAUCAUAGUCC-3'   |
| <i>m-Raptor</i> | Sense: 5'-GGAAGUCUUUGAACAGAAATT-3'<br>Anti-sense: 5'-UUUCUGUCAAAGACUUC-3'         |

**Supplementary Table 3.** Primers sequences for RT-qPCR.

| Gene Name          | Primer Sequences                                                               |
|--------------------|--------------------------------------------------------------------------------|
| <i>m-Gapdh</i>     | Forward: 5'-AGCTTCGGCACATATTTTCATCTG-3'<br>Reverse: 5'-CGTTCCTCCCATGACAAACA-3' |
| <i>m-Sphk1</i>     | Forward: 5'-GGTGCTGGAAGTGAACCTG-3'<br>Reverse: 5'-ACATGGGGCTGGAGAGAG-3'        |
| <i>m-Sphk2</i>     | Forward: 5'-GTTTGCCCTCACCTCAC-3'<br>Reverse: 5'-AGCCCGAGACCTCATCC-3'           |
| <i>m-S1pr1</i>     | Forward: 5'-TCGTCCGGCTTGAGCGAG-3'<br>Reverse: 5'-GAGCTTTTCCTTGGCTGGAG-3'       |
| <i>m-S1pr2</i>     | Forward: 5'-ACAGCAAGTCCACTCAGCAA-3'<br>Reverse: 5'-CTGCACGGGAGTTAAGGACAG-3'    |
| <i>m-S1pr3</i>     | Forward: 5'-CCATTGCCATTGAGCGACAC-3'<br>Reverse: 5'-TTAGCCAGCACATCCCAATCA-3'    |
| <i>m-Sgpp1</i>     | Forward: 5'-GATGCAGAGACCGAGGTTTCG-3'<br>Reverse: 5'-CGGCAAGTTGCTCACTTTGAC-3'   |
| <i>m-Sgpp2</i>     | Forward: 5'-CACCCACTGGAATATCGACCC-3'<br>Reverse: 5'-AAGTCTCACAACGGGAGGAAA-3'   |
| <i>m-Spl</i>       | Forward: 5'-CTGAAGGACTTCGAGCCTTATTT-3'<br>Reverse: 5'-GACACTCCACGCAATGAGC-3'   |
| <i>m-Cyclin d1</i> | Forward: 5'-AGAACAAGCAGACCATCCGC-3'<br>Reverse: 5'-GTCCTTGTTTAGCCAGAGGC-3'     |
| <i>m-Raptor</i>    | Forward: 5'-ATGTGCACAGCCCATTCTT-3'<br>Reverse: 5'-CGACAGGGCCAAGCTCA-3'         |

**Supplementary Table 4.** Echocardiology analysis of wild-type (*WT*) and *S1pr1<sup>CMKO</sup>* mice which underwent the sham operation or the AR operation at postnatal day 3 (P3), hearts were measured at 21-day post AR by echocardiography in the indicated

groups.

|                | Sham                 |                                         | Post-AR              |                                         |
|----------------|----------------------|-----------------------------------------|----------------------|-----------------------------------------|
|                | <i>WT</i><br>(N = 9) | <i>S1pr1<sup>CMKO</sup></i><br>(N = 10) | <i>WT</i><br>(N = 9) | <i>S1pr1<sup>CMKO</sup></i><br>(N = 10) |
| HR (beats/min) | 404.53 ±<br>13.03    | 410.48 ±<br>13.39                       | 409.15 ±<br>15.74    | 422.79 ±<br>17.34                       |
| IVS; d (mm)    | 0.59 ± 0.05          | 0.59 ± 0.05                             | 0.63 ± 0.03          | 0.67 ± 0.07                             |
| IVS; s (mm)    | 1.04 ± 0.05          | 0.98 ± 0.07                             | 1.07 ± 0.03          | 0.93 ± 0.08                             |
| LVID; d (mm)   | 2.85 ± 0.12          | 2.78 ± 0.19                             | 3.41 ± 0.07          | 3.30 ± 0.15                             |
| LVID; s (mm)   | 1.73 ± 0.16          | 1.80 ± 0.14                             | 2.19 ± 0.11          | 2.52 ± 0.13                             |
| LVPW; d (mm)   | 0.61 ± 0.04          | 0.70 ± 0.04                             | 0.75 ± 0.05          | 0.86 ± 0.06                             |
| LVPW; s (mm)   | 0.87 ± 0.05          | 1.03 ± 0.06                             | 1.08 ± 0.06          | 0.93 ± 0.05                             |
| LVEF (%)       | 70.95 ± 4.35         | 66.21 ± 2.26                            | 63.14 ± 3.00         | 46.76 ± 5.17*                           |
| LVFS (%)       | 39.97 ± 3.47         | 35.28 ± 1.74                            | 33.69 ± 2.01         | 23.40 ± 2.99*                           |
| LV Mass (mg)   | 38.04 ± 4.71         | 41.35 ± 6.68                            | 59.13 ± 1.87         | 65.52 ± 5.93                            |

Data are means ± SEM. \*P < 0.05 indicates significant statistical differences, compared with wild-type (*WT*) post AR groups by One-way ANOVA for multiple comparisons. HR, Heart Rate; IVS, Interventricular Septum; LVID, Left Ventricular Internal Dimension; LVPW, Left Ventricular Posterior Wall; LVEF, Left Ventricular Ejection Fraction; LVFS, Left Ventricular Fractional Shortening; LV Mass, Left Ventricular Mass.

**Supplementary Table 5.** Echocardiology analysis of wild-type (*WT*) and *S1pr1<sup>CMKO</sup>* 8-week-old mice subjected to MI operation, and hearts were measured at 28-day post MI by echocardiography in the indicated groups.

|                | Sham                 |                                        | Post-MI              |                                        |
|----------------|----------------------|----------------------------------------|----------------------|----------------------------------------|
|                | <i>WT</i><br>(N = 6) | <i>S1pr1<sup>CMKO</sup></i><br>(N = 6) | <i>WT</i><br>(N = 7) | <i>S1pr1<sup>CMKO</sup></i><br>(N = 7) |
| HR (beats/min) | 579.18 ±<br>19.11    | 568.86 ±<br>16.64                      | 417.7 ± 20.55        | 420.51 ±<br>36.98                      |
| IVS; d (mm)    | 0.80 ± 0.06          | 0.91 ± 0.05                            | 0.81 ± 0.06          | 0.87 ± 0.05                            |
| IVS; s (mm)    | 1.41 ± 0.06          | 1.33 ± 0.09                            | 1.16 ± 0.10          | 1.12 ± 0.11                            |
| LVID; d (mm)   | 3.91 ± 0.20          | 3.57 ± 0.20                            | 4.59 ± 0.23          | 4.34 ± 0.20                            |
| LVID; s (mm)   | 2.69 ± 0.22          | 2.42 ± 0.22                            | 3.60 ± 0.24          | 3.62 ± 0.15                            |
| LVPW; d (mm)   | 0.84 ± 0.08          | 0.87 ± 0.06                            | 0.80 ± 0.07          | 0.72 ± 0.06                            |
| LVPW; s (mm)   | 1.38 ± 0.10          | 1.33 ± 0.07                            | 0.97 ± 0.06          | 0.85 ± 0.11                            |
| LVEF (%)       | 61.43 ± 3.18         | 61.41 ± 4.26                           | 43.93 ± 3.26         | 32.88 ± 3.00*                          |
| LVFS (%)       | 32.52 ± 2.30         | 32.61 ± 2.89                           | 21.81 ± 1.81         | 14.96 ± 1.64*                          |
| LV Mass (mg)   | 93.03 ±<br>6.14      | 93.45 ± 11.84                          | 123.33 ± 16.8        | 107.57 ± 9.94                          |

Data are means ± SEM. \*P < 0.05 indicates significant statistical differences,

compared with wild-type (*WT*) post-MI groups by One-way ANOVA for multiple comparisons. HR, Heart Rate; IVS, Interventricular Septum; LVID, Left Ventricular Internal Dimension; LVPW, Left Ventricular Posterior Wall; LVEF, Left Ventricular Ejection Fraction; LVFS, Left Ventricular Fractional Shortening; LV Mass, Left Ventricular Mass.

**Supplementary Table 6.** Echocardiology analysis of neonatal *AAV9-cTnT-S1pr1-GFP* and *AAV9-cTnT-GFP* mice which underwent the sham operation or the AR operation at postnatal day 3 (P3), and hearts were measured at 21-day post AR in the indicated groups.

|                | Sham                            |                                       | Post-AR                         |                                       |
|----------------|---------------------------------|---------------------------------------|---------------------------------|---------------------------------------|
|                | <i>AAV9-cTnT-GFP</i><br>(N = 4) | <i>AAV9-cTnT-S1pr1-GFP</i><br>(N = 4) | <i>AAV9-cTnT-GFP</i><br>(N = 5) | <i>AAV9-cTnT-S1pr1-GFP</i><br>(N = 6) |
| HR (beats/min) | 404.07 ± 32.86                  | 428.01 ± 19.20                        | 408.27 ± 14.87                  | 415.72 ± 15.9                         |
| IVS; d (mm)    | 0.62 ± 0.10                     | 0.77 ± 0.11                           | 0.70 ± 0.08                     | 0.78 ± 1.10                           |
| IVS; s (mm)    | 0.91 ± 0.13                     | 0.99 ± 0.19                           | 1.10 ± 0.11                     | 1.19 ± 0.08                           |
| LVID; d(mm)    | 3.73 ± 0.16                     | 3.35 ± 0.18                           | 3.25 ± 0.11                     | 3.32 ± 0.16                           |
| LVID; s (mm)   | 2.62 ± 0.11                     | 2.35 ± 0.31                           | 2.21 ± 0.05                     | 2.29 ± 0.17                           |
| LVPW; d (mm)   | 0.78 ± 0.09                     | 0.87 ± 0.15                           | 0.81 ± 0.06                     | 0.92 ± 0.13                           |
| LVPW; s (mm)   | 1.00 ± 0.02                     | 1.04 ± 0.24                           | 1.15 ± 0.06                     | 1.33 ± 0.09                           |
| LVEF (%)       | 56.59 ± 5.59                    | 58.03 ± 8.31                          | 57.08 ± 1.31                    | 65.36 ± 2.46*                         |
| LVFS (%)       | 29.45 ± 3.79                    | 30.63 ± 5.52                          | 25.86 ± 2.82                    | 34.41 ± 1.43*                         |
| LV Mass (mg)   | 70.14 ± 7.64                    | 73.34 ± 12.19                         | 65.34 ± 9.85                    | 76.41 ± 6.91                          |

Data are means ± SEM. \*P < 0.05 indicates significant statistical differences, compared with *AAV9-cTnT-GFP* post AR groups by One-way ANOVA for multiple comparisons. HR, Heart Rate; IVS, Interventricular Septum; LVID, Left Ventricular Internal Dimension; LVPW, Left Ventricular Posterior Wall; LVEF, Left Ventricular Ejection Fraction; LVFS, Left Ventricular Fractional Shortening; LV Mass, Left Ventricular Mass.

**Supplementary Table 7.** Echocardiology analysis of neonatal *AAV9-cTnT-S1pr1-GFP* and *AAV9-cTnT-GFP* mice which underwent the AR operation at postnatal day 3 (P3), and hearts were measured at 21-day post AR with or without rapamycin treatment in the indicated groups.

|  | DMSO                            |                                 | Rapamycin                  |
|--|---------------------------------|---------------------------------|----------------------------|
|  | <i>AAV9-cTnT-GFP</i><br>(N = 4) | <i>AAV9-cTnT-S1pr1-GFP</i><br>P | <i>AAV9-cTnT-S1pr1-GFP</i> |
|  |                                 |                                 |                            |

|                |                | (N = 4)        | (N = 6)                   |
|----------------|----------------|----------------|---------------------------|
| HR (beats/min) | 406.84 ± 30.97 | 408.68 ± 24.70 | 414.39 ± 17.86            |
| IVS; d (mm)    | 0.68 ± 0.11    | 0.79 ± 0.18    | 0.68 ± 0.08               |
| IVS; s (mm)    | 1.03 ± 0.15    | 1.06 ± 0.17    | 1.02 ± 0.08               |
| LVID; d (mm)   | 3.35 ± 0.20    | 3.36 ± 0.27    | 3.28 ± 0.11               |
| LVID; s (mm)   | 2.28 ± 0.15    | 2.12 ± 0.26    | 2.37 ± 0.10               |
| LVPW; d (mm)   | 0.76 ± 0.08    | 0.75 ± 0.11    | 0.71 ± 0.08               |
| LVPW; s (mm)   | 1.12 ± 0.11    | 1.26 ± 0.06    | 0.95 ± 0.07               |
| LVEF (%)       | 58.49 ± 1.74   | 68.19 ± 4.54*  | 55.09 ± 1.91 <sup>#</sup> |
| LVFS (%)       | 27.64 ± 2.60   | 37.26 ± 3.48*  | 27.81 ± 1.22 <sup>#</sup> |
| LV Mass (mg)   | 62.45 ± 12.12  | 68.74 ± 14.93  | 57.21 ± 7.60              |

Data are means ± SEM. \*P < 0.05 indicates significant statistical differences, compared with AAV9-*cTNT-GFP* mice treated with DMSO groups by One-way ANOVA for multiple comparisons. <sup>#</sup>P < 0.05 indicates significant statistical differences, compared with AAV9-*cTnT-S1pr1-GFP* mice treated with DMSO groups by One-way ANOVA for multiple comparisons. HR, Heart Rate; IVS, Interventricular Septum; LVID, Left Ventricular Internal Dimension; LVPW, Left Ventricular Posterior Wall; LVEF, Left Ventricular Ejection Fraction; LVFS, Left Ventricular Fractional Shortening; LV Mass, Left Ventricular Mass.

**Supplementary Table 8.** Echocardiology analysis of wild-type (*WT*) and *S1pr1<sup>CMKO</sup>* mice subjected to AR operation at postnatal day 3 with or without rapamycin treatment, hearts were measured at 21-day post AR by echocardiography in the indicated groups.

|                | DMSO                 |                                        | Rapamycin                              |
|----------------|----------------------|----------------------------------------|----------------------------------------|
|                | <i>WT</i><br>(N = 7) | <i>S1pr1<sup>CMKO</sup></i><br>(N = 8) | <i>S1pr1<sup>CMKO</sup></i><br>(N = 7) |
| HR (beats/min) | 434.69 ± 23.34       | 458.54 ± 15.12                         | 463.26 ± 22.25                         |
| IVS; d (mm)    | 0.64 ± 0.05          | 0.72 ± 0.04                            | 0.67 ± 0.09                            |
| IVS; s (mm)    | 1.06 ± 0.03          | 1.03 ± 0.05                            | 1.14 ± 0.12                            |
| LVID; d (mm)   | 3.17 ± 0.16          | 3.24 ± 0.14                            | 3.10 ± 0.20                            |
| LVID; s (mm)   | 1.94 ± 0.14          | 2.22 ± 0.13                            | 2.18 ± 0.27                            |
| LVPW; d (mm)   | 0.78 ± 0.09          | 0.83 ± 0.08                            | 0.76 ± 0.10                            |
| LVPW; s (mm)   | 1.13 ± 0.08          | 1.08 ± 0.06                            | 1.12 ± 0.12                            |
| LVEF (%)       | 60.14 ± 3.11         | 50.19 ± 2.89*                          | 48.72 ± 3.31                           |
| LVFS (%)       | 38.94 ± 2.70         | 31.36 ± 1.95*                          | 31.14 ± 5.91                           |
| LV Mass (mg)   | 55.99 ± 6.73         | 64.91 ± 6.08                           | 54.65 ± 6.64                           |

Data are means ± SEM. \*P < 0.05 indicates significant statistical differences in *S1pr1<sup>CMKO</sup>* mice compared with wild-type (*WT*) mice treated with DMSO by One-way ANOVA for multiple comparisons, while no statistical significance in these mice compared with *S1pr1<sup>CMKO</sup>* mice treated with rapamycin by One-way ANOVA for multiple comparisons. HR, Heart Rate; IVS, Interventricular Septum; LVID, Left

Ventricular Internal Dimension; LVPW, Left Ventricular Posterior Wall; LVEF, Left Ventricular Ejection Fraction; LVFS, Left Ventricular Fractional Shortening; LV Mass, Left Ventricular Mass.

**Supplementary Table 9.** Echocardiology analysis of *AAV9-cTnT-S1pr1-GFP* and *AAV9-cTnT-GFP* adult mice with MI operation treated with or without rapamycin, hearts were measured at 28-day post MI by echocardiography in the indicated groups.

|                | Sham                            |                                       | Post-MI                         |                                       |
|----------------|---------------------------------|---------------------------------------|---------------------------------|---------------------------------------|
|                | <i>AAV9-cTnT-GFP</i><br>(N = 3) | <i>AAV9-cTnT-S1pr1-GFP</i><br>(N = 3) | <i>AAV9-cTnT-GFP</i><br>(N = 5) | <i>AAV9-cTnT-S1pr1-GFP</i><br>(N = 5) |
| HR (beats/min) | 510.65 ± 25.47                  | 463.59 ± 33.77                        | 421.57 ± 18.7                   | 419.42 ± 34.64                        |
| IVS; d (mm)    | 0.76 ± 0.02                     | 1.01 ± 0.13                           | 0.65 ± 0.07                     | 0.77 ± 0.05                           |
| IVS; s (mm)    | 1.37 ± 0.09                     | 1.56 ± 0.04                           | 0.77 ± 0.07                     | 1.14 ± 0.15                           |
| LVID; d (mm)   | 3.21 ± 0.23                     | 3.26 ± 0.04                           | 4.25 ± 0.35                     | 3.94 ± 0.29                           |
| LVID; s (mm)   | 2.08 ± 0.18                     | 1.94 ± 0.23                           | 3.69 ± 0.37                     | 2.82 ± 0.32                           |
| LVPW; d (mm)   | 1.03 ± 0.12                     | 1.03 ± 0.13                           | 0.84 ± 0.17                     | 0.97 ± 0.11                           |
| LVPW; s (mm)   | 1.27 ± 0.04                     | 1.55 ± 0.11                           | 1.24 ± 0.11                     | 1.46 ± 0.18                           |
| LVEF (%)       | 65.15 ± 6.61                    | 71.69 ± 7.12                          | 29.06 ± 4.87                    | 55.52 ± 6.64*                         |
| LVFS (%)       | 35.14 ± 4.85                    | 40.77 ± 6.32                          | 13.59 ± 2.45                    | 29.09 ± 4.21*                         |
| LV Mass (mg)   | 78.08 ± 8.92                    | 97.59 ± 17.36                         | 94.18 ± 13.11                   | 106.36 ± 17.57                        |

Data are means ± SEM. \*P < 0.05 indicates significant statistical differences, compared with *AAV9-cTnT-GFP* post-MI groups by One-way ANOVA for multiple comparisons. HR, Heart Rate; IVS, Interventricular Septum; LVID, Left Ventricular Internal Dimension; LVPW, Left Ventricular Posterior Wall; LVEF, Left Ventricular Ejection Fraction; LVFS, Left Ventricular Fractional Shortening; LV Mass, Left Ventricular Mass.

**Supplementary Table 10.** Echocardiology analysis of *AAV9-cTnT-S1pr1-GFP* and *AAV9-cTnT-GFP* 8-week-old mice which underwent MI operation in the indicated groups treated with or without rapamycin, and hearts were measured at 28-day post MI by echocardiography in the indicated groups.

|                | DMSO                            |                                       | Rapamycin                       |                                       |
|----------------|---------------------------------|---------------------------------------|---------------------------------|---------------------------------------|
|                | <i>AAV9-cTnT-GFP</i><br>(N = 6) | <i>AAV9-cTnT-S1pr1-GFP</i><br>(N = 6) | <i>AAV9-cTnT-GFP</i><br>(N = 6) | <i>AAV9-cTnT-S1pr1-GFP</i><br>(N = 6) |
| HR (beats/min) | 422.18 ± 63.82                  | 470.55 ± 29.99                        | 420.28 ± 53.52                  | 490.91 ± 21.97                        |

|              |                |               |                |                           |
|--------------|----------------|---------------|----------------|---------------------------|
| IVS; d (mm)  | 0.84 ± 0.11    | 0.79 ± 0.12   | 0.79 ± 0.31    | 0.82 ± 0.09               |
| IVS; s (mm)  | 1.19 ± 0.15    | 1.31 ± 0.08   | 1.21 ± 0.11    | 1.34 ± 0.06               |
| LVID; d (mm) | 3.82 ± 0.23    | 3.98 ± 0.33   | 3.62 ± 0.33    | 4.61 ± 0.21               |
| LVID; s (mm) | 3.15 ± 0.24    | 2.88 ± 0.32   | 3.21 ± 0.11    | 3.58 ± 0.29               |
| LVPW; d (mm) | 1.03 ± 0.13    | 0.91 ± 0.10   | 1.10 ± 0.12    | 1.07 ± 0.12               |
| LVPW; s (mm) | 1.46 ± 0.14    | 1.37 ± 0.11   | 1.52 ± 0.11    | 1.29 ± 0.14               |
| LVEF (%)     | 37.88 ± 3.33   | 54.97 ± 4.15* | 32.93 ± 1.64   | 31.58 ± 6.46 <sup>#</sup> |
| LVFS (%)     | 18.02 ± 1.78   | 28.39 ± 2.56* | 19.21 ± 1.53   | 15.28 ± 3.42 <sup>#</sup> |
| LV Mass (mg) | 107.12 ± 11.57 | 99.81 ± 10.21 | 114.13 ± 12.54 | 116.28 ± 4.05             |

Data are means ± SEM. \*P < 0.05 indicates significant statistical differences, compared with AAV9-*cTNT-GFP* mice treated with DMSO groups by One-way ANOVA for multiple comparisons. <sup>#</sup>P < 0.05 indicates significant statistical differences, compared with AAV9-*cTnT-S1pr1-GFP* mice treated with DMSO groups by One-way ANOVA for multiple comparisons. HR, Heart Rate; IVS, Interventricular Septum; LVID, Left Ventricular Internal Dimension; LVPW, Left Ventricular Posterior Wall; LVEF, Left Ventricular Ejection Fraction; LVFS, Left Ventricular Fractional Shortening; LV Mass, Left Ventricular Mass.
